# Supplementary material for: Cross-species cortical alignment identifies different types of anatomical reorganization in the primate temporal lobe
Source: eLife. 2020 Mar 23;9:e53232. doi: 10.7554/eLife.53232 (PMC7180052; doi:10.7554/eLife.53232)
Supplement: Appendix 3—figure 2—source data 1. — The values are organized as a table that stores dice coefficients and tract extension ratios for each individual comparison of human vs. macaque or chimpanzee subjects. [file elife-53232-app3-fig2-data1.csv]

species	hemi	tract	p_h	p_s	percentage	measure	value
chimp	L	CST	sub-01	Bo	20	dice_coeff	0.8231511254019294
chimp	L	CST	sub-01	Bo	30	dice_coeff	0.8096891035315424
chimp	L	CST	sub-01	Bo	40	dice_coeff	0.7493411717007906
chimp	L	CST	sub-01	Bo	50	dice_coeff	0.782021151586369
chimp	L	CST	sub-01	Bo	20	tract_extension	1.1169084821428572
chimp	L	CST	sub-01	Bo	30	tract_extension	1.1118359739049395
chimp	L	CST	sub-01	Bo	40	tract_extension	1.0798052211551468
chimp	L	CST	sub-01	Bo	50	tract_extension	1.0774927551787057
chimp	L	CST	sub-01	Cheeta	20	dice_coeff	0.7903557141312574
chimp	L	CST	sub-01	Cheeta	30	dice_coeff	0.785776361529548
chimp	L	CST	sub-01	Cheeta	40	dice_coeff	0.7715503462972828
chimp	L	CST	sub-01	Cheeta	50	dice_coeff	0.8096562864578659
chimp	L	CST	sub-01	Cheeta	20	tract_extension	1.0952120383036936
chimp	L	CST	sub-01	Cheeta	30	tract_extension	1.0995391705069124
chimp	L	CST	sub-01	Cheeta	40	tract_extension	1.102472034249413
chimp	L	CST	sub-01	Cheeta	50	tract_extension	1.112724451341166
chimp	L	CST	sub-01	Lulu	20	dice_coeff	0.7233210171701804
chimp	L	CST	sub-01	Lulu	30	dice_coeff	0.7500510377679482
chimp	L	CST	sub-01	Lulu	40	dice_coeff	0.7208324994996999
chimp	L	CST	sub-01	Lulu	50	dice_coeff	0.7619401138332096
chimp	L	CST	sub-01	Lulu	20	tract_extension	1.2028245192307692
chimp	L	CST	sub-01	Lulu	30	tract_extension	1.0823806931591362
chimp	L	CST	sub-01	Lulu	40	tract_extension	1.1081343697945585
chimp	L	CST	sub-01	Lulu	50	tract_extension	1.0868247266428495
chimp	L	CST	sub-01	Wenka	20	dice_coeff	0.7394674755645433
chimp	L	CST	sub-01	Wenka	30	dice_coeff	0.7369398985206889
chimp	L	CST	sub-01	Wenka	40	dice_coeff	0.7546838709677419
chimp	L	CST	sub-01	Wenka	50	dice_coeff	0.7974548405004911
chimp	L	CST	sub-01	Wenka	20	tract_extension	1.216347614706776
chimp	L	CST	sub-01	Wenka	30	tract_extension	1.1569045771916213
chimp	L	CST	sub-01	Wenka	40	tract_extension	1.0919162905211326
chimp	L	CST	sub-01	Wenka	50	tract_extension	1.0751847488486665
chimp	L	CST	sub-01	Foxy	20	dice_coeff	0.7838629215920182
chimp	L	CST	sub-01	Foxy	30	dice_coeff	0.7716186252771619
chimp	L	CST	sub-01	Foxy	40	dice_coeff	0.740890076105035
chimp	L	CST	sub-01	Foxy	50	dice_coeff	0.77330382225249
chimp	L	CST	sub-01	Foxy	20	tract_extension	1.1076369673491975
chimp	L	CST	sub-01	Foxy	30	tract_extension	1.0713002873563218
chimp	L	CST	sub-01	Foxy	40	tract_extension	1.0861224489795918
chimp	L	CST	sub-01	Foxy	50	tract_extension	1.1051298987230296
chimp	L	CST	sub-02	Bo	20	dice_coeff	0.849009900990099
chimp	L	CST	sub-02	Bo	30	dice_coeff	0.8532575291948371
chimp	L	CST	sub-02	Bo	40	dice_coeff	0.7593399598491896
chimp	L	CST	sub-02	Bo	50	dice_coeff	0.7745887881839544
chimp	L	CST	sub-02	Bo	20	tract_extension	1.1755102040816328
chimp	L	CST	sub-02	Bo	30	tract_extension	1.0839186025571763
chimp	L	CST	sub-02	Bo	40	tract_extension	1.0443641991230332
chimp	L	CST	sub-02	Bo	50	tract_extension	1.0880823401950162
chimp	L	CST	sub-02	Cheeta	20	dice_coeff	0.823321554770318
chimp	L	CST	sub-02	Cheeta	30	dice_coeff	0.8440891757113522
chimp	L	CST	sub-02	Cheeta	40	dice_coeff	0.7958876369489589
chimp	L	CST	sub-02	Cheeta	50	dice_coeff	0.8004486316733962
chimp	L	CST	sub-02	Cheeta	20	tract_extension	1.1536480686695278
chimp	L	CST	sub-02	Cheeta	30	tract_extension	1.0458731537793222
chimp	L	CST	sub-02	Cheeta	40	tract_extension	1.0566283924843425
chimp	L	CST	sub-02	Cheeta	50	tract_extension	1.12577065351418
chimp	L	CST	sub-02	Lulu	20	dice_coeff	0.7315712900096993
chimp	L	CST	sub-02	Lulu	30	dice_coeff	0.7930322225282291
chimp	L	CST	sub-02	Lulu	40	dice_coeff	0.747446386212906
chimp	L	CST	sub-02	Lulu	50	dice_coeff	0.7665979381443299
chimp	L	CST	sub-02	Lulu	20	tract_extension	1.3364269141531322
chimp	L	CST	sub-02	Lulu	30	tract_extension	1.0451467268623025
chimp	L	CST	sub-02	Lulu	40	tract_extension	1.0489637305699482
chimp	L	CST	sub-02	Lulu	50	tract_extension	1.0804733727810651
chimp	L	CST	sub-02	Wenka	20	dice_coeff	0.7792633703329969
chimp	L	CST	sub-02	Wenka	30	dice_coeff	0.787725631768953
chimp	L	CST	sub-02	Wenka	40	dice_coeff	0.7779950855022316
chimp	L	CST	sub-02	Wenka	50	dice_coeff	0.7852781691644252
chimp	L	CST	sub-02	Wenka	20	tract_extension	1.3052767886047265
chimp	L	CST	sub-02	Wenka	30	tract_extension	1.103391384051329
chimp	L	CST	sub-02	Wenka	40	tract_extension	1.043960293928065
chimp	L	CST	sub-02	Wenka	50	tract_extension	1.0921052631578947
chimp	L	CST	sub-02	Foxy	20	dice_coeff	0.7543624161073825
chimp	L	CST	sub-02	Foxy	30	dice_coeff	0.8132547037349059
chimp	L	CST	sub-02	Foxy	40	dice_coeff	0.7696990524817124
chimp	L	CST	sub-02	Foxy	50	dice_coeff	0.7757255936675461
chimp	L	CST	sub-02	Foxy	20	tract_extension	1.3044322225816887
chimp	L	CST	sub-02	Foxy	30	tract_extension	1.0391919889502763
chimp	L	CST	sub-02	Foxy	40	tract_extension	1.0330399285623166
chimp	L	CST	sub-02	Foxy	50	tract_extension	1.1019310950186527
chimp	L	CST	sub-03	Bo	20	dice_coeff	0.8320655354008192
chimp	L	CST	sub-03	Bo	30	dice_coeff	0.8244712103407755
chimp	L	CST	sub-03	Bo	40	dice_coeff	0.7527294187075834
chimp	L	CST	sub-03	Bo	50	dice_coeff	0.7769328263624841
chimp	L	CST	sub-03	Bo	20	tract_extension	1.1265822784810127
chimp	L	CST	sub-03	Bo	30	tract_extension	1.0760734010333155
chimp	L	CST	sub-03	Bo	40	tract_extension	1.046517705474977
chimp	L	CST	sub-03	Bo	50	tract_extension	1.0746057640021751
chimp	L	CST	sub-03	Cheeta	20	dice_coeff	0.7917262625151281
chimp	L	CST	sub-03	Cheeta	30	dice_coeff	0.8117030320204024
chimp	L	CST	sub-03	Cheeta	40	dice_coeff	0.7764214919144496
chimp	L	CST	sub-03	Cheeta	50	dice_coeff	0.7954627621113521
chimp	L	CST	sub-03	Cheeta	20	tract_extension	1.113118399110617
chimp	L	CST	sub-03	Cheeta	30	tract_extension	1.0542852155699074
chimp	L	CST	sub-03	Cheeta	40	tract_extension	1.0761891964525665
chimp	L	CST	sub-03	Cheeta	50	tract_extension	1.1227133280309056
chimp	L	CST	sub-03	Lulu	20	dice_coeff	0.7176980335518275
chimp	L	CST	sub-03	Lulu	30	dice_coeff	0.7623360191782648
chimp	L	CST	sub-03	Lulu	40	dice_coeff	0.7300661221314664
chimp	L	CST	sub-03	Lulu	50	dice_coeff	0.7539853869146462
chimp	L	CST	sub-03	Lulu	20	tract_extension	1.2399380804953561
chimp	L	CST	sub-03	Lulu	30	tract_extension	1.055206149545772
chimp	L	CST	sub-03	Lulu	40	tract_extension	1.0667288225892382
chimp	L	CST	sub-03	Lulu	50	tract_extension	1.088096024666887
chimp	L	CST	sub-03	Wenka	20	dice_coeff	0.7468383536445159
chimp	L	CST	sub-03	Wenka	30	dice_coeff	0.7651382569128456
chimp	L	CST	sub-03	Wenka	40	dice_coeff	0.765867418899859
chimp	L	CST	sub-03	Wenka	50	dice_coeff	0.7807730340943291
chimp	L	CST	sub-03	Wenka	20	tract_extension	1.2330665024630543
chimp	L	CST	sub-03	Wenka	30	tract_extension	1.1052150045745655
chimp	L	CST	sub-03	Wenka	40	tract_extension	1.0535385424888188
chimp	L	CST	sub-03	Wenka	50	tract_extension	1.088215859030837
chimp	L	CST	sub-03	Foxy	20	dice_coeff	0.7555802332037757
chimp	L	CST	sub-03	Foxy	30	dice_coeff	0.7768684477510991
chimp	L	CST	sub-03	Foxy	40	dice_coeff	0.7523668639053254
chimp	L	CST	sub-03	Foxy	50	dice_coeff	0.7649982859101817
chimp	L	CST	sub-03	Foxy	20	tract_extension	1.1772486772486772
chimp	L	CST	sub-03	Foxy	30	tract_extension	1.0517151314643913
chimp	L	CST	sub-03	Foxy	40	tract_extension	1.0498099357713986
chimp	L	CST	sub-03	Foxy	50	tract_extension	1.106990813354246
chimp	L	CST	sub-04	Bo	20	dice_coeff	0.8236835835120325
chimp	L	CST	sub-04	Bo	30	dice_coeff	0.8003455972352221
chimp	L	CST	sub-04	Bo	40	dice_coeff	0.7484411535463756
chimp	L	CST	sub-04	Bo	50	dice_coeff	0.7861788954716825
chimp	L	CST	sub-04	Bo	20	tract_extension	1.15504772924501
chimp	L	CST	sub-04	Bo	30	tract_extension	1.0748470672903923
chimp	L	CST	sub-04	Bo	40	tract_extension	1.0351470971101275
chimp	L	CST	sub-04	Bo	50	tract_extension	1.0657672849915683
chimp	L	CST	sub-04	Cheeta	20	dice_coeff	0.8061041292639138
chimp	L	CST	sub-04	Cheeta	30	dice_coeff	0.7938461538461539
chimp	L	CST	sub-04	Cheeta	40	dice_coeff	0.7831856113616338
chimp	L	CST	sub-04	Cheeta	50	dice_coeff	0.814578061881298
chimp	L	CST	sub-04	Cheeta	20	tract_extension	1.1116369710467706
chimp	L	CST	sub-04	Cheeta	30	tract_extension	1.0525017618040873
chimp	L	CST	sub-04	Cheeta	40	tract_extension	1.0525479814692256
chimp	L	CST	sub-04	Cheeta	50	tract_extension	1.102125340599455
chimp	L	CST	sub-04	Lulu	20	dice_coeff	0.7081154807910889
chimp	L	CST	sub-04	Lulu	30	dice_coeff	0.7606747496046389
chimp	L	CST	sub-04	Lulu	40	dice_coeff	0.7291877074015294
chimp	L	CST	sub-04	Lulu	50	dice_coeff	0.7657012691181257
chimp	L	CST	sub-04	Lulu	20	tract_extension	1.2818619582664526
chimp	L	CST	sub-04	Lulu	30	tract_extension	1.034996534996535
chimp	L	CST	sub-04	Lulu	40	tract_extension	1.048938134810711
chimp	L	CST	sub-04	Lulu	50	tract_extension	1.0743731406714832
chimp	L	CST	sub-04	Wenka	20	dice_coeff	0.7418516769012754
chimp	L	CST	sub-04	Wenka	30	dice_coeff	0.7500346596423124
chimp	L	CST	sub-04	Wenka	40	dice_coeff	0.7578748006379585
chimp	L	CST	sub-04	Wenka	50	dice_coeff	0.7910403772472738
chimp	L	CST	sub-04	Wenka	20	tract_extension	1.271251193887297
chimp	L	CST	sub-04	Wenka	30	tract_extension	1.1042513863216266
chimp	L	CST	sub-04	Wenka	40	tract_extension	1.0459029330527423
chimp	L	CST	sub-04	Wenka	50	tract_extension	1.076431764956355
chimp	L	CST	sub-04	Foxy	20	dice_coeff	0.81653156753054
chimp	L	CST	sub-04	Foxy	30	dice_coeff	0.7676
chimp	L	CST	sub-04	Foxy	40	dice_coeff	0.755808254092736
chimp	L	CST	sub-04	Foxy	50	dice_coeff	0.7827001556649417
chimp	L	CST	sub-04	Foxy	20	tract_extension	1.1166107382550337
chimp	L	CST	sub-04	Foxy	30	tract_extension	1.0376932430085113
chimp	L	CST	sub-04	Foxy	40	tract_extension	1.0313878080415047
chimp	L	CST	sub-04	Foxy	50	tract_extension	1.0870780477316706
chimp	L	CST	sub-05	Bo	20	dice_coeff	0.8376700567956676
chimp	L	CST	sub-05	Bo	30	dice_coeff	0.8443725523582495
chimp	L	CST	sub-05	Bo	40	dice_coeff	0.770602238768171
chimp	L	CST	sub-05	Bo	50	dice_coeff	0.7803428374536998
chimp	L	CST	sub-05	Bo	20	tract_extension	1.272469252601703
chimp	L	CST	sub-05	Bo	30	tract_extension	1.2093163944343617
chimp	L	CST	sub-05	Bo	40	tract_extension	1.05087419482056
chimp	L	CST	sub-05	Bo	50	tract_extension	1.0660117010707584
chimp	L	CST	sub-05	Cheeta	20	dice_coeff	0.8352837548760539
chimp	L	CST	sub-05	Cheeta	30	dice_coeff	0.8661570987152383
chimp	L	CST	sub-05	Cheeta	40	dice_coeff	0.7974016293062138
chimp	L	CST	sub-05	Cheeta	50	dice_coeff	0.8039585730724971
chimp	L	CST	sub-05	Cheeta	20	tract_extension	1.2157276288038565
chimp	L	CST	sub-05	Cheeta	30	tract_extension	1.1259857303792715
chimp	L	CST	sub-05	Cheeta	40	tract_extension	1.0675747863247864
chimp	L	CST	sub-05	Cheeta	50	tract_extension	1.1058055650979044
chimp	L	CST	sub-05	Lulu	20	dice_coeff	0.6961754479807435
chimp	L	CST	sub-05	Lulu	30	dice_coeff	0.7971092488659952
chimp	L	CST	sub-05	Lulu	40	dice_coeff	0.7569378468923447
chimp	L	CST	sub-05	Lulu	50	dice_coeff	0.7586761469443033
chimp	L	CST	sub-05	Lulu	20	tract_extension	1.5501344602381868
chimp	L	CST	sub-05	Lulu	30	tract_extension	1.1568287037037037
chimp	L	CST	sub-05	Lulu	40	tract_extension	1.056150085876602
chimp	L	CST	sub-05	Lulu	50	tract_extension	1.0774294321097846
chimp	L	CST	sub-05	Wenka	20	dice_coeff	0.7440699126092385
chimp	L	CST	sub-05	Wenka	30	dice_coeff	0.816890166028097
chimp	L	CST	sub-05	Wenka	40	dice_coeff	0.7790157845868152
chimp	L	CST	sub-05	Wenka	50	dice_coeff	0.7890439820911246
chimp	L	CST	sub-05	Wenka	20	tract_extension	1.5044742729306488
chimp	L	CST	sub-05	Wenka	30	tract_extension	1.1719757670510065
chimp	L	CST	sub-05	Wenka	40	tract_extension	1.0586677261289896
chimp	L	CST	sub-05	Wenka	50	tract_extension	1.0744325767690253
chimp	L	CST	sub-05	Foxy	20	dice_coeff	0.7916555939410045
chimp	L	CST	sub-05	Foxy	30	dice_coeff	0.8450571831427228
chimp	L	CST	sub-05	Foxy	40	dice_coeff	0.7714084223252065
chimp	L	CST	sub-05	Foxy	50	dice_coeff	0.7790631684637883
chimp	L	CST	sub-05	Foxy	20	tract_extension	1.3544813695871099
chimp	L	CST	sub-05	Foxy	30	tract_extension	1.1117908787541713
chimp	L	CST	sub-05	Foxy	40	tract_extension	1.0440120151495365
chimp	L	CST	sub-05	Foxy	50	tract_extension	1.0822593298218088
chimp	L	CST	sub-06	Bo	20	dice_coeff	0.8137727759914255
chimp	L	CST	sub-06	Bo	30	dice_coeff	0.8540735513212577
chimp	L	CST	sub-06	Bo	40	dice_coeff	0.7449283722718969
chimp	L	CST	sub-06	Bo	50	dice_coeff	0.7708593815120447
chimp	L	CST	sub-06	Bo	20	tract_extension	1.2933816266052025
chimp	L	CST	sub-06	Bo	30	tract_extension	1.1066838046272494
chimp	L	CST	sub-06	Bo	40	tract_extension	1.0277490965410427
chimp	L	CST	sub-06	Bo	50	tract_extension	1.077962802768166
chimp	L	CST	sub-06	Cheeta	20	dice_coeff	0.8186224489795919
chimp	L	CST	sub-06	Cheeta	30	dice_coeff	0.8602150537634409
chimp	L	CST	sub-06	Cheeta	40	dice_coeff	0.7828407224958949
chimp	L	CST	sub-06	Cheeta	50	dice_coeff	0.7978020014295926
chimp	L	CST	sub-06	Cheeta	20	tract_extension	1.2240573387348084
chimp	L	CST	sub-06	Cheeta	30	tract_extension	1.0463541666666667
chimp	L	CST	sub-06	Cheeta	40	tract_extension	1.0439171473518616
chimp	L	CST	sub-06	Cheeta	50	tract_extension	1.116474409228357
chimp	L	CST	sub-06	Lulu	20	dice_coeff	0.68321801655135
chimp	L	CST	sub-06	Lulu	30	dice_coeff	0.7889882615986584
chimp	L	CST	sub-06	Lulu	40	dice_coeff	0.7231017158024458
chimp	L	CST	sub-06	Lulu	50	dice_coeff	0.7588887525060349
chimp	L	CST	sub-06	Lulu	20	tract_extension	1.5599682287529786
chimp	L	CST	sub-06	Lulu	30	tract_extension	1.0674814027630182
chimp	L	CST	sub-06	Lulu	40	tract_extension	1.0439171473518616
chimp	L	CST	sub-06	Lulu	50	tract_extension	1.0749406944144921
chimp	L	CST	sub-06	Wenka	20	dice_coeff	0.7144466347507745
chimp	L	CST	sub-06	Wenka	30	dice_coeff	0.8077260755048288
chimp	L	CST	sub-06	Wenka	40	dice_coeff	0.7610715163430819
chimp	L	CST	sub-06	Wenka	50	dice_coeff	0.7794815316841748
chimp	L	CST	sub-06	Wenka	20	tract_extension	1.5482853764288529
chimp	L	CST	sub-06	Wenka	30	tract_extension	1.0918478260869566
chimp	L	CST	sub-06	Wenka	40	tract_extension	1.0285455954533713
chimp	L	CST	sub-06	Wenka	50	tract_extension	1.0834691881317249
chimp	L	CST	sub-06	Foxy	20	dice_coeff	0.7817765197465966
chimp	L	CST	sub-06	Foxy	30	dice_coeff	0.8253945583089337
chimp	L	CST	sub-06	Foxy	40	dice_coeff	0.7529582929194957
chimp	L	CST	sub-06	Foxy	50	dice_coeff	0.7677981884364683
chimp	L	CST	sub-06	Foxy	20	tract_extension	1.3544827586206896
chimp	L	CST	sub-06	Foxy	30	tract_extension	1.0429139989617582
chimp	L	CST	sub-06	Foxy	40	tract_extension	1.0257632358624242
chimp	L	CST	sub-06	Foxy	50	tract_extension	1.0991179713340684
chimp	L	CST	sub-07	Bo	20	dice_coeff	0.8357117584620828
chimp	L	CST	sub-07	Bo	30	dice_coeff	0.8354696049771382
chimp	L	CST	sub-07	Bo	40	dice_coeff	0.7549865746068277
chimp	L	CST	sub-07	Bo	50	dice_coeff	0.7800234820530023
chimp	L	CST	sub-07	Bo	20	tract_extension	1.1117696867061813
chimp	L	CST	sub-07	Bo	30	tract_extension	1.0863089897721157
chimp	L	CST	sub-07	Bo	40	tract_extension	1.01829035945637
chimp	L	CST	sub-07	Bo	50	tract_extension	1.0561229975271476
chimp	L	CST	sub-07	Cheeta	20	dice_coeff	0.8059403745982489
chimp	L	CST	sub-07	Cheeta	30	dice_coeff	0.834712527883716
chimp	L	CST	sub-07	Cheeta	40	dice_coeff	0.7915259441203562
chimp	L	CST	sub-07	Cheeta	50	dice_coeff	0.8103246694846659
chimp	L	CST	sub-07	Cheeta	20	tract_extension	1.0833333333333333
chimp	L	CST	sub-07	Cheeta	30	tract_extension	1.043793103448276
chimp	L	CST	sub-07	Cheeta	40	tract_extension	1.0365916731316265
chimp	L	CST	sub-07	Cheeta	50	tract_extension	1.0902330743618203
chimp	L	CST	sub-07	Lulu	20	dice_coeff	0.7268047006155568
chimp	L	CST	sub-07	Lulu	30	dice_coeff	0.783685064935065
chimp	L	CST	sub-07	Lulu	40	dice_coeff	0.7318456883509834
chimp	L	CST	sub-07	Lulu	50	dice_coeff	0.7643548055155381
chimp	L	CST	sub-07	Lulu	20	tract_extension	1.21311980289498
chimp	L	CST	sub-07	Lulu	30	tract_extension	1.0450543759709994
chimp	L	CST	sub-07	Lulu	40	tract_extension	1.0357881136950904
chimp	L	CST	sub-07	Lulu	50	tract_extension	1.0579429186860527
chimp	L	CST	sub-07	Wenka	20	dice_coeff	0.7629749768303985
chimp	L	CST	sub-07	Wenka	30	dice_coeff	0.7802868910666098
chimp	L	CST	sub-07	Wenka	40	dice_coeff	0.7605274768371
chimp	L	CST	sub-07	Wenka	50	dice_coeff	0.7866337055664478
chimp	L	CST	sub-07	Wenka	20	tract_extension	1.1961737017916794
chimp	L	CST	sub-07	Wenka	30	tract_extension	1.1019293775027303
chimp	L	CST	sub-07	Wenka	40	tract_extension	1.0335181126724249
chimp	L	CST	sub-07	Wenka	50	tract_extension	1.0644776766363242
chimp	L	CST	sub-07	Foxy	20	dice_coeff	0.7949435059850096
chimp	L	CST	sub-07	Foxy	30	dice_coeff	0.805454169823015
chimp	L	CST	sub-07	Foxy	40	dice_coeff	0.7616329689465029
chimp	L	CST	sub-07	Foxy	50	dice_coeff	0.7803236797274277
chimp	L	CST	sub-07	Foxy	20	tract_extension	1.1086405854207713
chimp	L	CST	sub-07	Foxy	30	tract_extension	1.0352257181942544
chimp	L	CST	sub-07	Foxy	40	tract_extension	1.01829035945637
chimp	L	CST	sub-07	Foxy	50	tract_extension	1.0722628534002838
chimp	L	CST	sub-08	Bo	20	dice_coeff	0.8178032274856845
chimp	L	CST	sub-08	Bo	30	dice_coeff	0.8547717842323651
chimp	L	CST	sub-08	Bo	40	dice_coeff	0.7425018652076597
chimp	L	CST	sub-08	Bo	50	dice_coeff	0.7722537477767426
chimp	L	CST	sub-08	Bo	20	tract_extension	1.2756206238064927
chimp	L	CST	sub-08	Bo	30	tract_extension	1.133681852128454
chimp	L	CST	sub-08	Bo	40	tract_extension	1.082395498392283
chimp	L	CST	sub-08	Bo	50	tract_extension	1.0775389339767494
chimp	L	CST	sub-08	Cheeta	20	dice_coeff	0.8046690674282875
chimp	L	CST	sub-08	Cheeta	30	dice_coeff	0.8310647307924984
chimp	L	CST	sub-08	Cheeta	40	dice_coeff	0.7642643430791035
chimp	L	CST	sub-08	Cheeta	50	dice_coeff	0.7881478796665459
chimp	L	CST	sub-08	Cheeta	20	tract_extension	1.237037037037037
chimp	L	CST	sub-08	Cheeta	30	tract_extension	1.105004549590537
chimp	L	CST	sub-08	Cheeta	40	tract_extension	1.1097527472527473
chimp	L	CST	sub-08	Cheeta	50	tract_extension	1.129570016095654
chimp	L	CST	sub-08	Lulu	20	dice_coeff	0.712249967315989
chimp	L	CST	sub-08	Lulu	30	dice_coeff	0.7893356023541092
chimp	L	CST	sub-08	Lulu	40	dice_coeff	0.7387016045929633
chimp	L	CST	sub-08	Lulu	50	dice_coeff	0.7588215712383489
chimp	L	CST	sub-08	Lulu	20	tract_extension	1.47136563876652
chimp	L	CST	sub-08	Lulu	30	tract_extension	1.0909090909090908
chimp	L	CST	sub-08	Lulu	40	tract_extension	1.073335990434436
chimp	L	CST	sub-08	Lulu	50	tract_extension	1.0775389339767494
chimp	L	CST	sub-08	Wenka	20	dice_coeff	0.7405994550408719
chimp	L	CST	sub-08	Wenka	30	dice_coeff	0.7925925925925926
chimp	L	CST	sub-08	Wenka	40	dice_coeff	0.7560133969349436
chimp	L	CST	sub-08	Wenka	50	dice_coeff	0.780416325475154
chimp	L	CST	sub-08	Wenka	20	tract_extension	1.4746136865342163
chimp	L	CST	sub-08	Wenka	30	tract_extension	1.1349532710280374
chimp	L	CST	sub-08	Wenka	40	tract_extension	1.0845751107531212
chimp	L	CST	sub-08	Wenka	50	tract_extension	1.0851557322730285
chimp	L	CST	sub-08	Foxy	20	dice_coeff	0.7461518392903731
chimp	L	CST	sub-08	Foxy	30	dice_coeff	0.8090994711294647
chimp	L	CST	sub-08	Foxy	40	dice_coeff	0.749639930469332
chimp	L	CST	sub-08	Foxy	50	dice_coeff	0.7663230240549828
chimp	L	CST	sub-08	Foxy	20	tract_extension	1.4013986013986015
chimp	L	CST	sub-08	Foxy	30	tract_extension	1.0873925501432664
chimp	L	CST	sub-08	Foxy	40	tract_extension	1.0704915860606863
chimp	L	CST	sub-08	Foxy	50	tract_extension	1.1014573991031391
chimp	L	CST	sub-09	Bo	20	dice_coeff	0.8434343434343434
chimp	L	CST	sub-09	Bo	30	dice_coeff	0.8644788574179573
chimp	L	CST	sub-09	Bo	40	dice_coeff	0.7666300987334197
chimp	L	CST	sub-09	Bo	50	dice_coeff	0.7821794817241818
chimp	L	CST	sub-09	Bo	20	tract_extension	1.1592814371257485
chimp	L	CST	sub-09	Bo	30	tract_extension	1.1143493595693337
chimp	L	CST	sub-09	Bo	40	tract_extension	1.0443606088200859
chimp	L	CST	sub-09	Bo	50	tract_extension	1.0566858883690566
chimp	L	CST	sub-09	Cheeta	20	dice_coeff	0.8093637454981992
chimp	L	CST	sub-09	Cheeta	30	dice_coeff	0.8580767768909161
chimp	L	CST	sub-09	Cheeta	40	dice_coeff	0.8016842105263158
chimp	L	CST	sub-09	Cheeta	50	dice_coeff	0.8087799990892117
chimp	L	CST	sub-09	Cheeta	20	tract_extension	1.1486205873628004
chimp	L	CST	sub-09	Cheeta	30	tract_extension	1.063607370659107
chimp	L	CST	sub-09	Cheeta	40	tract_extension	1.0540966386554622
chimp	L	CST	sub-09	Cheeta	50	tract_extension	1.0936936936936936
chimp	L	CST	sub-09	Lulu	20	dice_coeff	0.7143916913946587
chimp	L	CST	sub-09	Lulu	30	dice_coeff	0.7826706569759156
chimp	L	CST	sub-09	Lulu	40	dice_coeff	0.7513774104683195
chimp	L	CST	sub-09	Lulu	50	dice_coeff	0.7608177599397968
chimp	L	CST	sub-09	Lulu	20	tract_extension	1.3402561439944618
chimp	L	CST	sub-09	Lulu	30	tract_extension	1.0930444282592862
chimp	L	CST	sub-09	Lulu	40	tract_extension	1.051198114442844
chimp	L	CST	sub-09	Lulu	50	tract_extension	1.0673700406638091
chimp	L	CST	sub-09	Wenka	20	dice_coeff	0.7657054582904221
chimp	L	CST	sub-09	Wenka	30	dice_coeff	0.7983024346660711
chimp	L	CST	sub-09	Wenka	40	dice_coeff	0.7798524548460952
chimp	L	CST	sub-09	Wenka	50	dice_coeff	0.7907319185794716
chimp	L	CST	sub-09	Wenka	20	tract_extension	1.3019502353732346
chimp	L	CST	sub-09	Wenka	30	tract_extension	1.119753777280358
chimp	L	CST	sub-09	Wenka	40	tract_extension	1.0474947807933195
chimp	L	CST	sub-09	Wenka	50	tract_extension	1.06386241647497
chimp	L	CST	sub-09	Foxy	20	dice_coeff	0.7698817672682017
chimp	L	CST	sub-09	Foxy	30	dice_coeff	0.8361730013106159
chimp	L	CST	sub-09	Foxy	40	dice_coeff	0.772953594901414
chimp	L	CST	sub-09	Foxy	50	dice_coeff	0.7764492597228816
chimp	L	CST	sub-09	Foxy	20	tract_extension	1.2518590365341093
chimp	L	CST	sub-09	Foxy	30	tract_extension	1.0454545454545454
chimp	L	CST	sub-09	Foxy	40	tract_extension	1.0342695181654213
chimp	L	CST	sub-09	Foxy	50	tract_extension	1.0798309984434067
chimp	L	CST	sub-11	Bo	20	dice_coeff	0.8408268733850128
chimp	L	CST	sub-11	Bo	30	dice_coeff	0.8425001995689311
chimp	L	CST	sub-11	Bo	40	dice_coeff	0.777766351295763
chimp	L	CST	sub-11	Bo	50	dice_coeff	0.7817487266553481
chimp	L	CST	sub-11	Bo	20	tract_extension	1.2129686539643516
chimp	L	CST	sub-11	Bo	30	tract_extension	1.1497062725033163
chimp	L	CST	sub-11	Bo	40	tract_extension	1.058442417030279
chimp	L	CST	sub-11	Bo	50	tract_extension	1.085785644478228
chimp	L	CST	sub-11	Cheeta	20	dice_coeff	0.8130141190914671
chimp	L	CST	sub-11	Cheeta	30	dice_coeff	0.8548301686965731
chimp	L	CST	sub-11	Cheeta	40	dice_coeff	0.8091988608887217
chimp	L	CST	sub-11	Cheeta	50	dice_coeff	0.8040966148547606
chimp	L	CST	sub-11	Cheeta	20	tract_extension	1.1920869827846572
chimp	L	CST	sub-11	Cheeta	30	tract_extension	1.0738053097345133
chimp	L	CST	sub-11	Cheeta	40	tract_extension	1.0630810092961487
chimp	L	CST	sub-11	Cheeta	50	tract_extension	1.1270288548241658
chimp	L	CST	sub-11	Lulu	20	dice_coeff	0.7267352185089974
chimp	L	CST	sub-11	Lulu	30	dice_coeff	0.7897574123989218
chimp	L	CST	sub-11	Lulu	40	dice_coeff	0.7670650192424548
chimp	L	CST	sub-11	Lulu	50	dice_coeff	0.765790571547768
chimp	L	CST	sub-11	Lulu	20	tract_extension	1.3961796957905908
chimp	L	CST	sub-11	Lulu	30	tract_extension	1.089814981138854
chimp	L	CST	sub-11	Lulu	40	tract_extension	1.0569052020068657
chimp	L	CST	sub-11	Lulu	50	tract_extension	1.0894530398779692
chimp	L	CST	sub-11	Wenka	20	dice_coeff	0.7587318645889306
chimp	L	CST	sub-11	Wenka	30	dice_coeff	0.7955539088551314
chimp	L	CST	sub-11	Wenka	40	dice_coeff	0.7720837904194745
chimp	L	CST	sub-11	Wenka	50	dice_coeff	0.7875800034596091
chimp	L	CST	sub-11	Wenka	20	tract_extension	1.3976628895184136
chimp	L	CST	sub-11	Wenka	30	tract_extension	1.1302160953800298
chimp	L	CST	sub-11	Wenka	40	tract_extension	1.0832205683355887
chimp	L	CST	sub-11	Wenka	50	tract_extension	1.0980672084339995
chimp	L	CST	sub-11	Foxy	20	dice_coeff	0.7527656290198096
chimp	L	CST	sub-11	Foxy	30	dice_coeff	0.8395419626032758
chimp	L	CST	sub-11	Foxy	40	dice_coeff	0.7792696572067949
chimp	L	CST	sub-11	Foxy	50	dice_coeff	0.7803346380489483
chimp	L	CST	sub-11	Foxy	20	tract_extension	1.3489405331510596
chimp	L	CST	sub-11	Foxy	30	tract_extension	1.047479281767956
chimp	L	CST	sub-11	Foxy	40	tract_extension	1.0449027542096332
chimp	L	CST	sub-11	Foxy	50	tract_extension	1.1023040458604343
chimp	L	CST	sub-12	Bo	20	dice_coeff	0.841356534993014
chimp	L	CST	sub-12	Bo	30	dice_coeff	0.841540404040404
chimp	L	CST	sub-12	Bo	40	dice_coeff	0.7605451651412654
chimp	L	CST	sub-12	Bo	50	dice_coeff	0.787922176366546
chimp	L	CST	sub-12	Bo	20	tract_extension	1.1920289855072463
chimp	L	CST	sub-12	Bo	30	tract_extension	1.1151537884471119
chimp	L	CST	sub-12	Bo	40	tract_extension	1.0566383257030738
chimp	L	CST	sub-12	Bo	50	tract_extension	1.0643506146445751
chimp	L	CST	sub-12	Cheeta	20	dice_coeff	0.8232591876208898
chimp	L	CST	sub-12	Cheeta	30	dice_coeff	0.8438133874239351
chimp	L	CST	sub-12	Cheeta	40	dice_coeff	0.7878215223097113
chimp	L	CST	sub-12	Cheeta	50	dice_coeff	0.8028283192217618
chimp	L	CST	sub-12	Cheeta	20	tract_extension	1.1594713656387665
chimp	L	CST	sub-12	Cheeta	30	tract_extension	1.0587606837606838
chimp	L	CST	sub-12	Cheeta	40	tract_extension	1.0764925373134329
chimp	L	CST	sub-12	Cheeta	50	tract_extension	1.1171322786940423
chimp	L	CST	sub-12	Lulu	20	dice_coeff	0.6968746077569976
chimp	L	CST	sub-12	Lulu	30	dice_coeff	0.7816738106949617
chimp	L	CST	sub-12	Lulu	40	dice_coeff	0.7385415644322308
chimp	L	CST	sub-12	Lulu	50	dice_coeff	0.7585664625062076
chimp	L	CST	sub-12	Lulu	20	tract_extension	1.4221902017291066
chimp	L	CST	sub-12	Lulu	30	tract_extension	1.0690399137001079
chimp	L	CST	sub-12	Lulu	40	tract_extension	1.0734883720930233
chimp	L	CST	sub-12	Lulu	50	tract_extension	1.0864157119476268
chimp	L	CST	sub-12	Wenka	20	dice_coeff	0.7484326018808778
chimp	L	CST	sub-12	Wenka	30	dice_coeff	0.776183116214028
chimp	L	CST	sub-12	Wenka	40	dice_coeff	0.7650850038061405
chimp	L	CST	sub-12	Wenka	50	dice_coeff	0.7916005999571459
chimp	L	CST	sub-12	Wenka	20	tract_extension	1.3780104712041885
chimp	L	CST	sub-12	Wenka	30	tract_extension	1.127631329413996
chimp	L	CST	sub-12	Wenka	40	tract_extension	1.071637039002388
chimp	L	CST	sub-12	Wenka	50	tract_extension	1.0780640970116935
chimp	L	CST	sub-12	Foxy	20	dice_coeff	0.7801132787916928
chimp	L	CST	sub-12	Foxy	30	dice_coeff	0.8176986065220514
chimp	L	CST	sub-12	Foxy	40	dice_coeff	0.7578225886560048
chimp	L	CST	sub-12	Foxy	50	dice_coeff	0.7754997437211687
chimp	L	CST	sub-12	Foxy	20	tract_extension	1.2739593417231365
chimp	L	CST	sub-12	Foxy	30	tract_extension	1.044624033731553
chimp	L	CST	sub-12	Foxy	40	tract_extension	1.0588543714772578
chimp	L	CST	sub-12	Foxy	50	tract_extension	1.096827495042961
chimp	L	CST	sub-13	Bo	20	dice_coeff	0.8419085586146755
chimp	L	CST	sub-13	Bo	30	dice_coeff	0.836980306345733
chimp	L	CST	sub-13	Bo	40	dice_coeff	0.7600763994319018
chimp	L	CST	sub-13	Bo	50	dice_coeff	0.7863897331982438
chimp	L	CST	sub-13	Bo	20	tract_extension	1.1775673276117193
chimp	L	CST	sub-13	Bo	30	tract_extension	1.1335200746965453
chimp	L	CST	sub-13	Bo	40	tract_extension	1.0430412371134021
chimp	L	CST	sub-13	Bo	50	tract_extension	1.0628086751127335
chimp	L	CST	sub-13	Cheeta	20	dice_coeff	0.8365532772312433
chimp	L	CST	sub-13	Cheeta	30	dice_coeff	0.8388537402307406
chimp	L	CST	sub-13	Cheeta	40	dice_coeff	0.7855621916385354
chimp	L	CST	sub-13	Cheeta	50	dice_coeff	0.8085433035311117
chimp	L	CST	sub-13	Cheeta	20	tract_extension	1.1275148767356191
chimp	L	CST	sub-13	Cheeta	30	tract_extension	1.0771960958296363
chimp	L	CST	sub-13	Cheeta	40	tract_extension	1.0702102340341135
chimp	L	CST	sub-13	Cheeta	50	tract_extension	1.105662906288395
chimp	L	CST	sub-13	Lulu	20	dice_coeff	0.6957901159243441
chimp	L	CST	sub-13	Lulu	30	dice_coeff	0.7796586555207244
chimp	L	CST	sub-13	Lulu	40	dice_coeff	0.7352926935554157
chimp	L	CST	sub-13	Lulu	50	dice_coeff	0.7602256699576869
chimp	L	CST	sub-13	Lulu	20	tract_extension	1.3956506488951246
chimp	L	CST	sub-13	Lulu	30	tract_extension	1.0847033595425304
chimp	L	CST	sub-13	Lulu	40	tract_extension	1.0659818253654683
chimp	L	CST	sub-13	Lulu	50	tract_extension	1.0803230383062317
chimp	L	CST	sub-13	Wenka	20	dice_coeff	0.765968253968254
chimp	L	CST	sub-13	Wenka	30	dice_coeff	0.7726642841514112
chimp	L	CST	sub-13	Wenka	40	dice_coeff	0.7724331644680744
chimp	L	CST	sub-13	Wenka	50	dice_coeff	0.7934012114963268
chimp	L	CST	sub-13	Wenka	20	tract_extension	1.3192970822281167
chimp	L	CST	sub-13	Wenka	30	tract_extension	1.1459316594298659
chimp	L	CST	sub-13	Wenka	40	tract_extension	1.0511688311688312
chimp	L	CST	sub-13	Wenka	50	tract_extension	1.0720164609053497
chimp	L	CST	sub-13	Foxy	20	dice_coeff	0.7963645295996069
chimp	L	CST	sub-13	Foxy	30	dice_coeff	0.8062081731453794
chimp	L	CST	sub-13	Foxy	40	dice_coeff	0.7619936164988952
chimp	L	CST	sub-13	Foxy	50	dice_coeff	0.7811081613428107
chimp	L	CST	sub-13	Foxy	20	tract_extension	1.227328809376928
chimp	L	CST	sub-13	Foxy	30	tract_extension	1.0720593429883434
chimp	L	CST	sub-13	Foxy	40	tract_extension	1.0431756669673926
chimp	L	CST	sub-13	Foxy	50	tract_extension	1.0852976647297445
chimp	L	CST	sub-14	Bo	20	dice_coeff	0.8164256795835744
chimp	L	CST	sub-14	Bo	30	dice_coeff	0.8025765778112794
chimp	L	CST	sub-14	Bo	40	dice_coeff	0.7244266818917119
chimp	L	CST	sub-14	Bo	50	dice_coeff	0.7521764855041839
chimp	L	CST	sub-14	Bo	20	tract_extension	1.1164635874185322
chimp	L	CST	sub-14	Bo	30	tract_extension	1.0327868852459017
chimp	L	CST	sub-14	Bo	40	tract_extension	1.0390122159464075
chimp	L	CST	sub-14	Bo	50	tract_extension	1.0829306663670075
chimp	L	CST	sub-14	Cheeta	20	dice_coeff	0.784890050076203
chimp	L	CST	sub-14	Cheeta	30	dice_coeff	0.7935696509046882
chimp	L	CST	sub-14	Cheeta	40	dice_coeff	0.7544110147883734
chimp	L	CST	sub-14	Cheeta	50	dice_coeff	0.7778886268819154
chimp	L	CST	sub-14	Cheeta	20	tract_extension	1.0929264909847434
chimp	L	CST	sub-14	Cheeta	30	tract_extension	1.025258518392948
chimp	L	CST	sub-14	Cheeta	40	tract_extension	1.0693524401784507
chimp	L	CST	sub-14	Cheeta	50	tract_extension	1.12358633554856
chimp	L	CST	sub-14	Lulu	20	dice_coeff	0.6703140387350913
chimp	L	CST	sub-14	Lulu	30	dice_coeff	0.7469894870978019
chimp	L	CST	sub-14	Lulu	40	dice_coeff	0.6906258797034812
chimp	L	CST	sub-14	Lulu	50	dice_coeff	0.7328383591190012
chimp	L	CST	sub-14	Lulu	20	tract_extension	1.2863206007182502
chimp	L	CST	sub-14	Lulu	30	tract_extension	1.0317297850562948
chimp	L	CST	sub-14	Lulu	40	tract_extension	1.0747282608695652
chimp	L	CST	sub-14	Lulu	50	tract_extension	1.0908988000905593
chimp	L	CST	sub-14	Wenka	20	dice_coeff	0.7589952477936184
chimp	L	CST	sub-14	Wenka	30	dice_coeff	0.7657333333333333
chimp	L	CST	sub-14	Wenka	40	dice_coeff	0.7307673592525912
chimp	L	CST	sub-14	Wenka	50	dice_coeff	0.7565732943804778
chimp	L	CST	sub-14	Wenka	20	tract_extension	1.174716756112105
chimp	L	CST	sub-14	Wenka	30	tract_extension	1.0531081316385165
chimp	L	CST	sub-14	Wenka	40	tract_extension	1.053402583566387
chimp	L	CST	sub-14	Wenka	50	tract_extension	1.0944917660420215
chimp	L	CST	sub-14	Foxy	20	dice_coeff	0.769600349421271
chimp	L	CST	sub-14	Foxy	30	dice_coeff	0.7620150550086856
chimp	L	CST	sub-14	Foxy	40	dice_coeff	0.7259501902789152
chimp	L	CST	sub-14	Foxy	50	dice_coeff	0.7455138662316476
chimp	L	CST	sub-14	Foxy	20	tract_extension	1.1180476730987514
chimp	L	CST	sub-14	Foxy	30	tract_extension	1.0212765957446808
chimp	L	CST	sub-14	Foxy	40	tract_extension	1.0497677504976775
chimp	L	CST	sub-14	Foxy	50	tract_extension	1.1098698606472417
chimp	L	CST	sub-15	Bo	20	dice_coeff	0.8127355425601039
chimp	L	CST	sub-15	Bo	30	dice_coeff	0.8506735919493589
chimp	L	CST	sub-15	Bo	40	dice_coeff	0.7725825203457514
chimp	L	CST	sub-15	Bo	50	dice_coeff	0.7891431520991052
chimp	L	CST	sub-15	Bo	20	tract_extension	1.2852574352414454
chimp	L	CST	sub-15	Bo	30	tract_extension	1.1555046746804045
chimp	L	CST	sub-15	Bo	40	tract_extension	1.0512954723894268
chimp	L	CST	sub-15	Bo	50	tract_extension	1.0560340128638395
chimp	L	CST	sub-15	Cheeta	20	dice_coeff	0.8239087301587301
chimp	L	CST	sub-15	Cheeta	30	dice_coeff	0.8596734442390634
chimp	L	CST	sub-15	Cheeta	40	dice_coeff	0.7962382445141065
chimp	L	CST	sub-15	Cheeta	50	dice_coeff	0.8085497586761664
chimp	L	CST	sub-15	Cheeta	20	tract_extension	1.2098133654425045
chimp	L	CST	sub-15	Cheeta	30	tract_extension	1.085110195305501
chimp	L	CST	sub-15	Cheeta	40	tract_extension	1.0722007206726278
chimp	L	CST	sub-15	Cheeta	50	tract_extension	1.1014212620807278
chimp	L	CST	sub-15	Lulu	20	dice_coeff	0.6600522193211488
chimp	L	CST	sub-15	Lulu	30	dice_coeff	0.7860804274059635
chimp	L	CST	sub-15	Lulu	40	dice_coeff	0.7512350915714356
chimp	L	CST	sub-15	Lulu	50	dice_coeff	0.7577986304844028
chimp	L	CST	sub-15	Lulu	20	tract_extension	1.5897943037974684
chimp	L	CST	sub-15	Lulu	30	tract_extension	1.112417340191036
chimp	L	CST	sub-15	Lulu	40	tract_extension	1.067357512953368
chimp	L	CST	sub-15	Lulu	50	tract_extension	1.0806559571619812
chimp	L	CST	sub-15	Wenka	20	dice_coeff	0.7343218609712965
chimp	L	CST	sub-15	Wenka	30	dice_coeff	0.7958968170161412
chimp	L	CST	sub-15	Wenka	40	dice_coeff	0.7727787501286936
chimp	L	CST	sub-15	Wenka	50	dice_coeff	0.7882693319305629
chimp	L	CST	sub-15	Wenka	20	tract_extension	1.4890700259355316
chimp	L	CST	sub-15	Wenka	30	tract_extension	1.1478392721758908
chimp	L	CST	sub-15	Wenka	40	tract_extension	1.070343725019984
chimp	L	CST	sub-15	Wenka	50	tract_extension	1.0774107440774108
chimp	L	CST	sub-15	Foxy	20	dice_coeff	0.7911944770092484
chimp	L	CST	sub-15	Foxy	30	dice_coeff	0.8293294030950626
chimp	L	CST	sub-15	Foxy	40	dice_coeff	0.7701588578322944
chimp	L	CST	sub-15	Foxy	50	dice_coeff	0.7806600688843354
chimp	L	CST	sub-15	Foxy	20	tract_extension	1.3233454066513006
chimp	L	CST	sub-15	Foxy	30	tract_extension	1.0762395592678158
chimp	L	CST	sub-15	Foxy	40	tract_extension	1.0488250652741515
chimp	L	CST	sub-15	Foxy	50	tract_extension	1.081983692617
chimp	L	CST	sub-16	Bo	20	dice_coeff	0.7825213460572576
chimp	L	CST	sub-16	Bo	30	dice_coeff	0.8552352525331867
chimp	L	CST	sub-16	Bo	40	dice_coeff	0.7533067192535232
chimp	L	CST	sub-16	Bo	50	dice_coeff	0.7743157894736843
chimp	L	CST	sub-16	Bo	20	tract_extension	1.2567394094993583
chimp	L	CST	sub-16	Bo	30	tract_extension	1.1030492285084497
chimp	L	CST	sub-16	Bo	40	tract_extension	1.0154514110586133
chimp	L	CST	sub-16	Bo	50	tract_extension	1.0576400217509516
chimp	L	CST	sub-16	Cheeta	20	dice_coeff	0.7871984714592787
chimp	L	CST	sub-16	Cheeta	30	dice_coeff	0.8489154824233358
chimp	L	CST	sub-16	Cheeta	40	dice_coeff	0.7937567387174617
chimp	L	CST	sub-16	Cheeta	50	dice_coeff	0.8013550135501354
chimp	L	CST	sub-16	Cheeta	20	tract_extension	1.1881067961165048
chimp	L	CST	sub-16	Cheeta	30	tract_extension	1.058149779735683
chimp	L	CST	sub-16	Cheeta	40	tract_extension	1.028719275549806
chimp	L	CST	sub-16	Cheeta	50	tract_extension	1.0962687408409424
chimp	L	CST	sub-16	Lulu	20	dice_coeff	0.6684702410231185
chimp	L	CST	sub-16	Lulu	30	dice_coeff	0.7966410076976908
chimp	L	CST	sub-16	Lulu	40	dice_coeff	0.7298335467349552
chimp	L	CST	sub-16	Lulu	50	dice_coeff	0.7574492705707319
chimp	L	CST	sub-16	Lulu	20	tract_extension	1.4407652685798382
chimp	L	CST	sub-16	Lulu	30	tract_extension	1.0549894588896698
chimp	L	CST	sub-16	Lulu	40	tract_extension	1.033398310591293
chimp	L	CST	sub-16	Lulu	50	tract_extension	1.0612178088171105
chimp	L	CST	sub-16	Wenka	20	dice_coeff	0.7127496159754224
chimp	L	CST	sub-16	Wenka	30	dice_coeff	0.7844056866481021
chimp	L	CST	sub-16	Wenka	40	dice_coeff	0.7626635192288779
chimp	L	CST	sub-16	Wenka	50	dice_coeff	0.7781201848998459
chimp	L	CST	sub-16	Wenka	20	tract_extension	1.4066091954022988
chimp	L	CST	sub-16	Wenka	30	tract_extension	1.1220104633781764
chimp	L	CST	sub-16	Wenka	40	tract_extension	1.0255352076347692
chimp	L	CST	sub-16	Wenka	50	tract_extension	1.0698569856985698
chimp	L	CST	sub-16	Foxy	20	dice_coeff	0.7867310310682015
chimp	L	CST	sub-16	Foxy	30	dice_coeff	0.8357056004577642
chimp	L	CST	sub-16	Foxy	40	dice_coeff	0.7602503760492988
chimp	L	CST	sub-16	Foxy	50	dice_coeff	0.7730733042511334
chimp	L	CST	sub-16	Foxy	20	tract_extension	1.2322215229704216
chimp	L	CST	sub-16	Foxy	30	tract_extension	1.0279014036288943
chimp	L	CST	sub-16	Foxy	40	tract_extension	1.0150625478682664
chimp	L	CST	sub-16	Foxy	50	tract_extension	1.076012392122151
chimp	L	CST	sub-17	Bo	20	dice_coeff	0.8026208026208026
chimp	L	CST	sub-17	Bo	30	dice_coeff	0.8793650793650793
chimp	L	CST	sub-17	Bo	40	dice_coeff	0.7692460910267902
chimp	L	CST	sub-17	Bo	50	dice_coeff	0.788798524356502
chimp	L	CST	sub-17	Bo	20	tract_extension	1.3374149659863945
chimp	L	CST	sub-17	Bo	30	tract_extension	1.151054531635949
chimp	L	CST	sub-17	Bo	40	tract_extension	1.0429829104091144
chimp	L	CST	sub-17	Bo	50	tract_extension	1.0698341836734695
chimp	L	CST	sub-17	Cheeta	20	dice_coeff	0.808565866320571
chimp	L	CST	sub-17	Cheeta	30	dice_coeff	0.8853975596140043
chimp	L	CST	sub-17	Cheeta	40	dice_coeff	0.802606684885432
chimp	L	CST	sub-17	Cheeta	50	dice_coeff	0.8079060595195411
chimp	L	CST	sub-17	Cheeta	20	tract_extension	1.2622792937399678
chimp	L	CST	sub-17	Cheeta	30	tract_extension	1.0913348946135832
chimp	L	CST	sub-17	Cheeta	40	tract_extension	1.0550026191723416
chimp	L	CST	sub-17	Cheeta	50	tract_extension	1.1167202929102407
chimp	L	CST	sub-17	Lulu	20	dice_coeff	0.6782026234998605
chimp	L	CST	sub-17	Lulu	30	dice_coeff	0.80602608304602
chimp	L	CST	sub-17	Lulu	40	dice_coeff	0.7531931617213599
chimp	L	CST	sub-17	Lulu	50	dice_coeff	0.772165458141068
chimp	L	CST	sub-17	Lulu	20	tract_extension	1.6181069958847736
chimp	L	CST	sub-17	Lulu	30	tract_extension	1.1266505486330667
chimp	L	CST	sub-17	Lulu	40	tract_extension	1.0508739890425254
chimp	L	CST	sub-17	Lulu	50	tract_extension	1.0740582648596735
chimp	L	CST	sub-17	Wenka	20	dice_coeff	0.7159140095224354
chimp	L	CST	sub-17	Wenka	30	dice_coeff	0.8351528384279476
chimp	L	CST	sub-17	Wenka	40	dice_coeff	0.7774221409338007
chimp	L	CST	sub-17	Wenka	50	dice_coeff	0.7940110054173953
chimp	L	CST	sub-17	Wenka	20	tract_extension	1.58484482063684
chimp	L	CST	sub-17	Wenka	30	tract_extension	1.1312791783380018
chimp	L	CST	sub-17	Wenka	40	tract_extension	1.0529342569598745
chimp	L	CST	sub-17	Wenka	50	tract_extension	1.081444074352638
chimp	L	CST	sub-17	Foxy	20	dice_coeff	0.7663680220537561
chimp	L	CST	sub-17	Foxy	30	dice_coeff	0.8597215848248433
chimp	L	CST	sub-17	Foxy	40	dice_coeff	0.7687947494033414
chimp	L	CST	sub-17	Foxy	50	dice_coeff	0.7782312925170068
chimp	L	CST	sub-17	Foxy	20	tract_extension	1.4143884892086331
chimp	L	CST	sub-17	Foxy	30	tract_extension	1.0779359430604982
chimp	L	CST	sub-17	Foxy	40	tract_extension	1.0420385461130512
chimp	L	CST	sub-17	Foxy	50	tract_extension	1.0997596153846154
chimp	L	CST	sub-18	Bo	20	dice_coeff	0.8530622748327329
chimp	L	CST	sub-18	Bo	30	dice_coeff	0.8502740798747064
chimp	L	CST	sub-18	Bo	40	dice_coeff	0.7488184324537219
chimp	L	CST	sub-18	Bo	50	dice_coeff	0.7661552766155277
chimp	L	CST	sub-18	Bo	20	tract_extension	1.2003016591251885
chimp	L	CST	sub-18	Bo	30	tract_extension	1.1132805304844355
chimp	L	CST	sub-18	Bo	40	tract_extension	1.0502301117685733
chimp	L	CST	sub-18	Bo	50	tract_extension	1.089143865842895
chimp	L	CST	sub-18	Cheeta	20	dice_coeff	0.8269536504830622
chimp	L	CST	sub-18	Cheeta	30	dice_coeff	0.8318293683347007
chimp	L	CST	sub-18	Cheeta	40	dice_coeff	0.7827449341967829
chimp	L	CST	sub-18	Cheeta	50	dice_coeff	0.7897282878972829
chimp	L	CST	sub-18	Cheeta	20	tract_extension	1.1768707482993197
chimp	L	CST	sub-18	Cheeta	30	tract_extension	1.0837367760444683
chimp	L	CST	sub-18	Cheeta	40	tract_extension	1.0657859621030157
chimp	L	CST	sub-18	Cheeta	50	tract_extension	1.1302953972979162
chimp	L	CST	sub-18	Lulu	20	dice_coeff	0.7388632872503841
chimp	L	CST	sub-18	Lulu	30	dice_coeff	0.785818968525368
chimp	L	CST	sub-18	Lulu	40	dice_coeff	0.7341575002433565
chimp	L	CST	sub-18	Lulu	50	dice_coeff	0.757672660824785
chimp	L	CST	sub-18	Lulu	20	tract_extension	1.3787248787248787
chimp	L	CST	sub-18	Lulu	30	tract_extension	1.0735346358792184
chimp	L	CST	sub-18	Lulu	40	tract_extension	1.0590029169981436
chimp	L	CST	sub-18	Lulu	50	tract_extension	1.0822188116641087
chimp	L	CST	sub-18	Wenka	20	dice_coeff	0.7573568753344034
chimp	L	CST	sub-18	Wenka	30	dice_coeff	0.7871392035074899
chimp	L	CST	sub-18	Wenka	40	dice_coeff	0.7685325264750378
chimp	L	CST	sub-18	Wenka	50	dice_coeff	0.7821075268817205
chimp	L	CST	sub-18	Wenka	20	tract_extension	1.4055104203461675
chimp	L	CST	sub-18	Wenka	30	tract_extension	1.122168585220943
chimp	L	CST	sub-18	Wenka	40	tract_extension	1.0481627296587928
chimp	L	CST	sub-18	Wenka	50	tract_extension	1.0857897052353718
chimp	L	CST	sub-18	Foxy	20	dice_coeff	0.7724827056110685
chimp	L	CST	sub-18	Foxy	30	dice_coeff	0.8118402282453637
chimp	L	CST	sub-18	Foxy	40	dice_coeff	0.7516043044723072
chimp	L	CST	sub-18	Foxy	50	dice_coeff	0.7597204955630814
chimp	L	CST	sub-18	Foxy	20	tract_extension	1.3197346600331674
chimp	L	CST	sub-18	Foxy	30	tract_extension	1.062027763134774
chimp	L	CST	sub-18	Foxy	40	tract_extension	1.0491264941547354
chimp	L	CST	sub-18	Foxy	50	tract_extension	1.1140954745514051
chimp	L	CST	sub-19	Bo	20	dice_coeff	0.8210851240650598
chimp	L	CST	sub-19	Bo	30	dice_coeff	0.796513671188585
chimp	L	CST	sub-19	Bo	40	dice_coeff	0.7307077459671559
chimp	L	CST	sub-19	Bo	50	dice_coeff	0.7566990042309499
chimp	L	CST	sub-19	Bo	20	tract_extension	1.1631000578369
chimp	L	CST	sub-19	Bo	30	tract_extension	1.0598305683021532
chimp	L	CST	sub-19	Bo	40	tract_extension	1.0347387960753116
chimp	L	CST	sub-19	Bo	50	tract_extension	1.0855077374901163
chimp	L	CST	sub-19	Cheeta	20	dice_coeff	0.7880550274018566
chimp	L	CST	sub-19	Cheeta	30	dice_coeff	0.7992588017294626
chimp	L	CST	sub-19	Cheeta	40	dice_coeff	0.772621449635263
chimp	L	CST	sub-19	Cheeta	50	dice_coeff	0.7870247517957635
chimp	L	CST	sub-19	Cheeta	20	tract_extension	1.1416406471757026
chimp	L	CST	sub-19	Cheeta	30	tract_extension	1.0312553666494935
chimp	L	CST	sub-19	Cheeta	40	tract_extension	1.0451319137538502
chimp	L	CST	sub-19	Cheeta	50	tract_extension	1.1173119404720382
chimp	L	CST	sub-19	Lulu	20	dice_coeff	0.6881160077036366
chimp	L	CST	sub-19	Lulu	30	dice_coeff	0.7654913144931295
chimp	L	CST	sub-19	Lulu	40	dice_coeff	0.7118773580400211
chimp	L	CST	sub-19	Lulu	50	dice_coeff	0.7449300919511272
chimp	L	CST	sub-19	Lulu	20	tract_extension	1.3243332235758973
chimp	L	CST	sub-19	Lulu	30	tract_extension	1.0169348010160881
chimp	L	CST	sub-19	Lulu	40	tract_extension	1.0470951294780626
chimp	L	CST	sub-19	Lulu	50	tract_extension	1.0833051516176304
chimp	L	CST	sub-19	Wenka	20	dice_coeff	0.734141461692362
chimp	L	CST	sub-19	Wenka	30	dice_coeff	0.7465287231146203
chimp	L	CST	sub-19	Wenka	40	dice_coeff	0.7465570197166352
chimp	L	CST	sub-19	Wenka	50	dice_coeff	0.7677918914216113
chimp	L	CST	sub-19	Wenka	20	tract_extension	1.289515870471305
chimp	L	CST	sub-19	Wenka	30	tract_extension	1.0950036469730124
chimp	L	CST	sub-19	Wenka	40	tract_extension	1.0357000663570006
chimp	L	CST	sub-19	Wenka	50	tract_extension	1.0889518413597734
chimp	L	CST	sub-19	Foxy	20	dice_coeff	0.7781065088757396
chimp	L	CST	sub-19	Foxy	30	dice_coeff	0.7711080495965361
chimp	L	CST	sub-19	Foxy	40	dice_coeff	0.7408240066467915
chimp	L	CST	sub-19	Foxy	50	dice_coeff	0.7543897680468242
chimp	L	CST	sub-19	Foxy	20	tract_extension	1.1763673588768646
chimp	L	CST	sub-19	Foxy	30	tract_extension	1.0217798196358687
chimp	L	CST	sub-19	Foxy	40	tract_extension	1.0296872938382373
chimp	L	CST	sub-19	Foxy	50	tract_extension	1.1045977011494252
chimp	L	CST	sub-20	Bo	20	dice_coeff	0.8206130174624496
chimp	L	CST	sub-20	Bo	30	dice_coeff	0.8250644581607938
chimp	L	CST	sub-20	Bo	40	dice_coeff	0.7618499529140944
chimp	L	CST	sub-20	Bo	50	dice_coeff	0.7849835123023591
chimp	L	CST	sub-20	Bo	20	tract_extension	1.1976190476190476
chimp	L	CST	sub-20	Bo	30	tract_extension	1.150189393939394
chimp	L	CST	sub-20	Bo	40	tract_extension	1.0942178272215355
chimp	L	CST	sub-20	Bo	50	tract_extension	1.087139164153382
chimp	L	CST	sub-20	Cheeta	20	dice_coeff	0.7920906567992599
chimp	L	CST	sub-20	Cheeta	30	dice_coeff	0.8212531626730168
chimp	L	CST	sub-20	Cheeta	40	dice_coeff	0.7793013385569703
chimp	L	CST	sub-20	Cheeta	50	dice_coeff	0.7988809169261315
chimp	L	CST	sub-20	Cheeta	20	tract_extension	1.1748905109489052
chimp	L	CST	sub-20	Cheeta	30	tract_extension	1.100579920260964
chimp	L	CST	sub-20	Cheeta	40	tract_extension	1.1125541125541125
chimp	L	CST	sub-20	Cheeta	50	tract_extension	1.1401943063714415
chimp	L	CST	sub-20	Lulu	20	dice_coeff	0.679867204173583
chimp	L	CST	sub-20	Lulu	30	dice_coeff	0.7684914333472629
chimp	L	CST	sub-20	Lulu	40	dice_coeff	0.7506307605169661
chimp	L	CST	sub-20	Lulu	50	dice_coeff	0.7638796542553191
chimp	L	CST	sub-20	Lulu	20	tract_extension	1.4035577258458318
chimp	L	CST	sub-20	Lulu	30	tract_extension	1.100779409099148
chimp	L	CST	sub-20	Lulu	40	tract_extension	1.093016874742763
chimp	L	CST	sub-20	Lulu	50	tract_extension	1.098139484278098
chimp	L	CST	sub-20	Wenka	20	dice_coeff	0.736660505237215
chimp	L	CST	sub-20	Wenka	30	dice_coeff	0.7576199504156337
chimp	L	CST	sub-20	Wenka	40	dice_coeff	0.7629248634604168
chimp	L	CST	sub-20	Wenka	50	dice_coeff	0.7925747265052977
chimp	L	CST	sub-20	Wenka	20	tract_extension	1.3462696554031448
chimp	L	CST	sub-20	Wenka	30	tract_extension	1.1690086621751685
chimp	L	CST	sub-20	Wenka	40	tract_extension	1.107450653322213
chimp	L	CST	sub-20	Wenka	50	tract_extension	1.0969459841321596
chimp	L	CST	sub-20	Foxy	20	dice_coeff	0.7881396461023434
chimp	L	CST	sub-20	Foxy	30	dice_coeff	0.8011958146487294
chimp	L	CST	sub-20	Foxy	40	dice_coeff	0.7588659793814433
chimp	L	CST	sub-20	Foxy	50	dice_coeff	0.7778777363663625
chimp	L	CST	sub-20	Foxy	20	tract_extension	1.220873786407767
chimp	L	CST	sub-20	Foxy	30	tract_extension	1.0790689410092396
chimp	L	CST	sub-20	Foxy	40	tract_extension	1.0823257709550334
chimp	L	CST	sub-20	Foxy	50	tract_extension	1.111686309064875
chimp	L	CST	sub-21	Bo	20	dice_coeff	0.8048024786986832
chimp	L	CST	sub-21	Bo	30	dice_coeff	0.817131412725312
chimp	L	CST	sub-21	Bo	40	dice_coeff	0.7538338976299542
chimp	L	CST	sub-21	Bo	50	dice_coeff	0.7830746332128429
chimp	L	CST	sub-21	Bo	20	tract_extension	1.2682066089188322
chimp	L	CST	sub-21	Bo	30	tract_extension	1.128393665158371
chimp	L	CST	sub-21	Bo	40	tract_extension	1.0644649933949801
chimp	L	CST	sub-21	Bo	50	tract_extension	1.0811339198435972
chimp	L	CST	sub-21	Cheeta	20	dice_coeff	0.7994111152005889
chimp	L	CST	sub-21	Cheeta	30	dice_coeff	0.8250257315100721
chimp	L	CST	sub-21	Cheeta	40	dice_coeff	0.7824487651077247
chimp	L	CST	sub-21	Cheeta	50	dice_coeff	0.8039233493778948
chimp	L	CST	sub-21	Cheeta	20	tract_extension	1.2133210558624923
chimp	L	CST	sub-21	Cheeta	30	tract_extension	1.0666547852432722
chimp	L	CST	sub-21	Cheeta	40	tract_extension	1.0823371390194763
chimp	L	CST	sub-21	Cheeta	50	tract_extension	1.124491640307275
chimp	L	CST	sub-21	Lulu	20	dice_coeff	0.6694066272797329
chimp	L	CST	sub-21	Lulu	30	dice_coeff	0.777087646652864
chimp	L	CST	sub-21	Lulu	40	dice_coeff	0.7379899793692897
chimp	L	CST	sub-21	Lulu	50	dice_coeff	0.7599582027168234
chimp	L	CST	sub-21	Lulu	20	tract_extension	1.5168841135840367
chimp	L	CST	sub-21	Lulu	30	tract_extension	1.0630550621669628
chimp	L	CST	sub-21	Lulu	40	tract_extension	1.0726837060702876
chimp	L	CST	sub-21	Lulu	50	tract_extension	1.0949290507094929
chimp	L	CST	sub-21	Wenka	20	dice_coeff	0.7084563758389262
chimp	L	CST	sub-21	Wenka	30	dice_coeff	0.7521713954834974
chimp	L	CST	sub-21	Wenka	40	dice_coeff	0.7612903225806451
chimp	L	CST	sub-21	Wenka	50	dice_coeff	0.7869491745742883
chimp	L	CST	sub-21	Wenka	20	tract_extension	1.497915877226222
chimp	L	CST	sub-21	Wenka	30	tract_extension	1.1518475750577368
chimp	L	CST	sub-21	Wenka	40	tract_extension	1.0754037101294542
chimp	L	CST	sub-21	Wenka	50	tract_extension	1.0961347869177402
chimp	L	CST	sub-21	Foxy	20	dice_coeff	0.787146529562982
chimp	L	CST	sub-21	Foxy	30	dice_coeff	0.8052076002814919
chimp	L	CST	sub-21	Foxy	40	dice_coeff	0.7587749825991846
chimp	L	CST	sub-21	Foxy	50	dice_coeff	0.7758145147388381
chimp	L	CST	sub-21	Foxy	20	tract_extension	1.2909862834748531
chimp	L	CST	sub-21	Foxy	30	tract_extension	1.0461457787100157
chimp	L	CST	sub-21	Foxy	40	tract_extension	1.0559559690735159
chimp	L	CST	sub-21	Foxy	50	tract_extension	1.1058771247639152
chimp	L	MDLF	sub-01	Bo	20	dice_coeff	0.5389300847457628
chimp	L	MDLF	sub-01	Bo	30	dice_coeff	0.5674317306081421
chimp	L	MDLF	sub-01	Bo	40	dice_coeff	0.6201492537313432
chimp	L	MDLF	sub-01	Bo	50	dice_coeff	0.7026581118240147
chimp	L	MDLF	sub-01	Bo	20	tract_extension	1.9567567567567568
chimp	L	MDLF	sub-01	Bo	30	tract_extension	1.7239444936521995
chimp	L	MDLF	sub-01	Bo	40	tract_extension	1.5826313678299238
chimp	L	MDLF	sub-01	Bo	50	tract_extension	1.3164623010696583
chimp	L	MDLF	sub-01	Cheeta	20	dice_coeff	0.4918911296009025
chimp	L	MDLF	sub-01	Cheeta	30	dice_coeff	0.5504209907969453
chimp	L	MDLF	sub-01	Cheeta	40	dice_coeff	0.6071558697077898
chimp	L	MDLF	sub-01	Cheeta	50	dice_coeff	0.7016463921051346
chimp	L	MDLF	sub-01	Cheeta	20	tract_extension	2.283256880733945
chimp	L	MDLF	sub-01	Cheeta	30	tract_extension	2.0771967271433653
chimp	L	MDLF	sub-01	Cheeta	40	tract_extension	1.8941430628900624
chimp	L	MDLF	sub-01	Cheeta	50	tract_extension	1.4053752959197883
chimp	L	MDLF	sub-01	Lulu	20	dice_coeff	0.5693814885217138
chimp	L	MDLF	sub-01	Lulu	30	dice_coeff	0.6234432930886966
chimp	L	MDLF	sub-01	Lulu	40	dice_coeff	0.6778995804574367
chimp	L	MDLF	sub-01	Lulu	50	dice_coeff	0.696286472148541
chimp	L	MDLF	sub-01	Lulu	20	tract_extension	2.0451977401129944
chimp	L	MDLF	sub-01	Lulu	30	tract_extension	1.7807258310460505
chimp	L	MDLF	sub-01	Lulu	40	tract_extension	1.5753643441804752
chimp	L	MDLF	sub-01	Lulu	50	tract_extension	1.373061224489796
chimp	L	MDLF	sub-01	Wenka	20	dice_coeff	0.6232472808282008
chimp	L	MDLF	sub-01	Wenka	30	dice_coeff	0.6706553755522828
chimp	L	MDLF	sub-01	Wenka	40	dice_coeff	0.7279808677827126
chimp	L	MDLF	sub-01	Wenka	50	dice_coeff	0.797056135456251
chimp	L	MDLF	sub-01	Wenka	20	tract_extension	1.6745164003364172
chimp	L	MDLF	sub-01	Wenka	30	tract_extension	1.6027998902003844
chimp	L	MDLF	sub-01	Wenka	40	tract_extension	1.4813215693636193
chimp	L	MDLF	sub-01	Wenka	50	tract_extension	1.2181050090525045
chimp	L	MDLF	sub-01	Foxy	20	dice_coeff	0.5343843435716227
chimp	L	MDLF	sub-01	Foxy	30	dice_coeff	0.6013060039905678
chimp	L	MDLF	sub-01	Foxy	40	dice_coeff	0.6753228814144623
chimp	L	MDLF	sub-01	Foxy	50	dice_coeff	0.7486930347995987
chimp	L	MDLF	sub-01	Foxy	20	tract_extension	2.0254323499491353
chimp	L	MDLF	sub-01	Foxy	30	tract_extension	1.7613876319758672
chimp	L	MDLF	sub-01	Foxy	40	tract_extension	1.6140314992841072
chimp	L	MDLF	sub-01	Foxy	50	tract_extension	1.4236140499365213
chimp	L	MDLF	sub-02	Bo	20	dice_coeff	0.5983263598326359
chimp	L	MDLF	sub-02	Bo	30	dice_coeff	0.5947288006111536
chimp	L	MDLF	sub-02	Bo	40	dice_coeff	0.6378254211332313
chimp	L	MDLF	sub-02	Bo	50	dice_coeff	0.6848715409870239
chimp	L	MDLF	sub-02	Bo	20	tract_extension	2.085529854760624
chimp	L	MDLF	sub-02	Bo	30	tract_extension	1.913937058445729
chimp	L	MDLF	sub-02	Bo	40	tract_extension	1.6164465786314526
chimp	L	MDLF	sub-02	Bo	50	tract_extension	1.4945974737482879
chimp	L	MDLF	sub-02	Cheeta	20	dice_coeff	0.5981277164827816
chimp	L	MDLF	sub-02	Cheeta	30	dice_coeff	0.6134878819810328
chimp	L	MDLF	sub-02	Cheeta	40	dice_coeff	0.63047363717605
chimp	L	MDLF	sub-02	Cheeta	50	dice_coeff	0.6389859622105076
chimp	L	MDLF	sub-02	Cheeta	20	tract_extension	2.1671324762437116
chimp	L	MDLF	sub-02	Cheeta	30	tract_extension	2.0474063895568535
chimp	L	MDLF	sub-02	Cheeta	40	tract_extension	1.9085754783841247
chimp	L	MDLF	sub-02	Cheeta	50	tract_extension	1.8207267334074897
chimp	L	MDLF	sub-02	Lulu	20	dice_coeff	0.4844613259668509
chimp	L	MDLF	sub-02	Lulu	30	dice_coeff	0.607933283438469
chimp	L	MDLF	sub-02	Lulu	40	dice_coeff	0.6674564459930313
chimp	L	MDLF	sub-02	Lulu	50	dice_coeff	0.7014123511492661
chimp	L	MDLF	sub-02	Lulu	20	tract_extension	2.7633642195295796
chimp	L	MDLF	sub-02	Lulu	30	tract_extension	2.0963770664790715
chimp	L	MDLF	sub-02	Lulu	40	tract_extension	1.6869910210899979
chimp	L	MDLF	sub-02	Lulu	50	tract_extension	1.551010739102969
chimp	L	MDLF	sub-02	Wenka	20	dice_coeff	0.6494030082183284
chimp	L	MDLF	sub-02	Wenka	30	dice_coeff	0.7199370202716001
chimp	L	MDLF	sub-02	Wenka	40	dice_coeff	0.743854748603352
chimp	L	MDLF	sub-02	Wenka	50	dice_coeff	0.7604834591159282
chimp	L	MDLF	sub-02	Wenka	20	tract_extension	1.8514804202483286
chimp	L	MDLF	sub-02	Wenka	30	tract_extension	1.6293056314926189
chimp	L	MDLF	sub-02	Wenka	40	tract_extension	1.5168982350732256
chimp	L	MDLF	sub-02	Wenka	50	tract_extension	1.4656021489329951
chimp	L	MDLF	sub-02	Foxy	20	dice_coeff	0.5934101606882
chimp	L	MDLF	sub-02	Foxy	30	dice_coeff	0.5942995755003032
chimp	L	MDLF	sub-02	Foxy	40	dice_coeff	0.6862649256336848
chimp	L	MDLF	sub-02	Foxy	50	dice_coeff	0.7070319316000698
chimp	L	MDLF	sub-02	Foxy	20	tract_extension	2.1208971553610505
chimp	L	MDLF	sub-02	Foxy	30	tract_extension	2.0272108843537415
chimp	L	MDLF	sub-02	Foxy	40	tract_extension	1.644078144078144
chimp	L	MDLF	sub-02	Foxy	50	tract_extension	1.6158275748601514
chimp	L	MDLF	sub-03	Bo	20	dice_coeff	0.6145583038869258
chimp	L	MDLF	sub-03	Bo	30	dice_coeff	0.6237570059663714
chimp	L	MDLF	sub-03	Bo	40	dice_coeff	0.6415520813712564
chimp	L	MDLF	sub-03	Bo	50	dice_coeff	0.6779829757578774
chimp	L	MDLF	sub-03	Bo	20	tract_extension	1.8408463661453542
chimp	L	MDLF	sub-03	Bo	30	tract_extension	1.708695652173913
chimp	L	MDLF	sub-03	Bo	40	tract_extension	1.5697788216872186
chimp	L	MDLF	sub-03	Bo	50	tract_extension	1.4615271659324522
chimp	L	MDLF	sub-03	Cheeta	20	dice_coeff	0.5866351271437019
chimp	L	MDLF	sub-03	Cheeta	30	dice_coeff	0.6381450702780344
chimp	L	MDLF	sub-03	Cheeta	40	dice_coeff	0.6663236807290901
chimp	L	MDLF	sub-03	Cheeta	50	dice_coeff	0.6729962464120114
chimp	L	MDLF	sub-03	Cheeta	20	tract_extension	2.0171370967741935
chimp	L	MDLF	sub-03	Cheeta	30	tract_extension	1.8954983922829582
chimp	L	MDLF	sub-03	Cheeta	40	tract_extension	1.769247738804324
chimp	L	MDLF	sub-03	Cheeta	50	tract_extension	1.6327099737532809
chimp	L	MDLF	sub-03	Lulu	20	dice_coeff	0.6052832493510459
chimp	L	MDLF	sub-03	Lulu	30	dice_coeff	0.6490093419566779
chimp	L	MDLF	sub-03	Lulu	40	dice_coeff	0.6799259310061039
chimp	L	MDLF	sub-03	Lulu	50	dice_coeff	0.6847396957414328
chimp	L	MDLF	sub-03	Lulu	20	tract_extension	2.019172552976791
chimp	L	MDLF	sub-03	Lulu	30	tract_extension	1.864916165770326
chimp	L	MDLF	sub-03	Lulu	40	tract_extension	1.617914060923946
chimp	L	MDLF	sub-03	Lulu	50	tract_extension	1.5302890528905289
chimp	L	MDLF	sub-03	Wenka	20	dice_coeff	0.6913750344447507
chimp	L	MDLF	sub-03	Wenka	30	dice_coeff	0.7540322580645161
chimp	L	MDLF	sub-03	Wenka	40	dice_coeff	0.7620884419341507
chimp	L	MDLF	sub-03	Wenka	50	dice_coeff	0.780663936193145
chimp	L	MDLF	sub-03	Wenka	20	tract_extension	1.5950577919489837
chimp	L	MDLF	sub-03	Wenka	30	tract_extension	1.5011459129106188
chimp	L	MDLF	sub-03	Wenka	40	tract_extension	1.4497469269703542
chimp	L	MDLF	sub-03	Wenka	50	tract_extension	1.3741543559298632
chimp	L	MDLF	sub-03	Foxy	20	dice_coeff	0.6389166072701354
chimp	L	MDLF	sub-03	Foxy	30	dice_coeff	0.6498251068791294
chimp	L	MDLF	sub-03	Foxy	40	dice_coeff	0.6765479983377198
chimp	L	MDLF	sub-03	Foxy	50	dice_coeff	0.7142455113412507
chimp	L	MDLF	sub-03	Foxy	20	tract_extension	1.785809906291834
chimp	L	MDLF	sub-03	Foxy	30	tract_extension	1.762858851674641
chimp	L	MDLF	sub-03	Foxy	40	tract_extension	1.642096642096642
chimp	L	MDLF	sub-03	Foxy	50	tract_extension	1.5686367218282111
chimp	L	MDLF	sub-04	Bo	20	dice_coeff	0.6677504064024008
chimp	L	MDLF	sub-04	Bo	30	dice_coeff	0.6215715968366146
chimp	L	MDLF	sub-04	Bo	40	dice_coeff	0.6576734619805215
chimp	L	MDLF	sub-04	Bo	50	dice_coeff	0.71276963324942
chimp	L	MDLF	sub-04	Bo	20	tract_extension	1.4310861423220973
chimp	L	MDLF	sub-04	Bo	30	tract_extension	1.5665944775311316
chimp	L	MDLF	sub-04	Bo	40	tract_extension	1.4806843267108167
chimp	L	MDLF	sub-04	Bo	50	tract_extension	1.3677285318559558
chimp	L	MDLF	sub-04	Cheeta	20	dice_coeff	0.6879334257975035
chimp	L	MDLF	sub-04	Cheeta	30	dice_coeff	0.6738830938791577
chimp	L	MDLF	sub-04	Cheeta	40	dice_coeff	0.652536385474071
chimp	L	MDLF	sub-04	Cheeta	50	dice_coeff	0.6977225672877847
chimp	L	MDLF	sub-04	Cheeta	20	tract_extension	1.540725806451613
chimp	L	MDLF	sub-04	Cheeta	30	tract_extension	1.690128504672897
chimp	L	MDLF	sub-04	Cheeta	40	tract_extension	1.7429623213512344
chimp	L	MDLF	sub-04	Cheeta	50	tract_extension	1.5422458222708106
chimp	L	MDLF	sub-04	Lulu	20	dice_coeff	0.7086950334424362
chimp	L	MDLF	sub-04	Lulu	30	dice_coeff	0.6603611349957008
chimp	L	MDLF	sub-04	Lulu	40	dice_coeff	0.7063129002744739
chimp	L	MDLF	sub-04	Lulu	50	dice_coeff	0.7130832380754443
chimp	L	MDLF	sub-04	Lulu	20	tract_extension	1.5345381526104418
chimp	L	MDLF	sub-04	Lulu	30	tract_extension	1.6744791666666667
chimp	L	MDLF	sub-04	Lulu	40	tract_extension	1.4894522575869726
chimp	L	MDLF	sub-04	Lulu	50	tract_extension	1.439084814922763
chimp	L	MDLF	sub-04	Wenka	20	dice_coeff	0.7808429118773945
chimp	L	MDLF	sub-04	Wenka	30	dice_coeff	0.7684054753977062
chimp	L	MDLF	sub-04	Wenka	40	dice_coeff	0.768250597292275
chimp	L	MDLF	sub-04	Wenka	50	dice_coeff	0.8024131119534462
chimp	L	MDLF	sub-04	Wenka	20	tract_extension	1.2499182204775925
chimp	L	MDLF	sub-04	Wenka	30	tract_extension	1.3931150698122292
chimp	L	MDLF	sub-04	Wenka	40	tract_extension	1.390635798203179
chimp	L	MDLF	sub-04	Wenka	50	tract_extension	1.3140385894876914
chimp	L	MDLF	sub-04	Foxy	20	dice_coeff	0.6690504568931268
chimp	L	MDLF	sub-04	Foxy	30	dice_coeff	0.6389648259522508
chimp	L	MDLF	sub-04	Foxy	40	dice_coeff	0.7212141652613828
chimp	L	MDLF	sub-04	Foxy	50	dice_coeff	0.7428443398868536
chimp	L	MDLF	sub-04	Foxy	20	tract_extension	1.5126682501979414
chimp	L	MDLF	sub-04	Foxy	30	tract_extension	1.650598973188819
chimp	L	MDLF	sub-04	Foxy	40	tract_extension	1.505611672278339
chimp	L	MDLF	sub-04	Foxy	50	tract_extension	1.4892173126225305
chimp	L	MDLF	sub-05	Bo	20	dice_coeff	0.5982860203535083
chimp	L	MDLF	sub-05	Bo	30	dice_coeff	0.6023909864969468
chimp	L	MDLF	sub-05	Bo	40	dice_coeff	0.6556358564726766
chimp	L	MDLF	sub-05	Bo	50	dice_coeff	0.6921806993846616
chimp	L	MDLF	sub-05	Bo	20	tract_extension	1.7448522829006268
chimp	L	MDLF	sub-05	Bo	30	tract_extension	1.6661907481439178
chimp	L	MDLF	sub-05	Bo	40	tract_extension	1.5213691742409592
chimp	L	MDLF	sub-05	Bo	50	tract_extension	1.4611159294593814
chimp	L	MDLF	sub-05	Cheeta	20	dice_coeff	0.5677179962894249
chimp	L	MDLF	sub-05	Cheeta	30	dice_coeff	0.6220542905438998
chimp	L	MDLF	sub-05	Cheeta	40	dice_coeff	0.6554671820411805
chimp	L	MDLF	sub-05	Cheeta	50	dice_coeff	0.657289573565528
chimp	L	MDLF	sub-05	Cheeta	20	tract_extension	1.959778783308195
chimp	L	MDLF	sub-05	Cheeta	30	tract_extension	1.8654092071611252
chimp	L	MDLF	sub-05	Cheeta	40	tract_extension	1.7843048310274439
chimp	L	MDLF	sub-05	Cheeta	50	tract_extension	1.716711956521739
chimp	L	MDLF	sub-05	Lulu	20	dice_coeff	0.6341968911917099
chimp	L	MDLF	sub-05	Lulu	30	dice_coeff	0.6407595927956147
chimp	L	MDLF	sub-05	Lulu	40	dice_coeff	0.7224840587746049
chimp	L	MDLF	sub-05	Lulu	50	dice_coeff	0.7246422893481718
chimp	L	MDLF	sub-05	Lulu	20	tract_extension	1.8197945845004668
chimp	L	MDLF	sub-05	Lulu	30	tract_extension	1.782768102658112
chimp	L	MDLF	sub-05	Lulu	40	tract_extension	1.5094013814274752
chimp	L	MDLF	sub-05	Lulu	50	tract_extension	1.4784262103261665
chimp	L	MDLF	sub-05	Wenka	20	dice_coeff	0.6797402941566185
chimp	L	MDLF	sub-05	Wenka	30	dice_coeff	0.7329774281165121
chimp	L	MDLF	sub-05	Wenka	40	dice_coeff	0.76240863209189
chimp	L	MDLF	sub-05	Wenka	50	dice_coeff	0.7773621727110099
chimp	L	MDLF	sub-05	Wenka	20	tract_extension	1.5196881091617933
chimp	L	MDLF	sub-05	Wenka	30	tract_extension	1.491183235369282
chimp	L	MDLF	sub-05	Wenka	40	tract_extension	1.4366325785244705
chimp	L	MDLF	sub-05	Wenka	50	tract_extension	1.4097629009762902
chimp	L	MDLF	sub-05	Foxy	20	dice_coeff	0.6208413527632665
chimp	L	MDLF	sub-05	Foxy	30	dice_coeff	0.6535571839347
chimp	L	MDLF	sub-05	Foxy	40	dice_coeff	0.7490374518725936
chimp	L	MDLF	sub-05	Foxy	50	dice_coeff	0.7580545403429856
chimp	L	MDLF	sub-05	Foxy	20	tract_extension	1.7263064658990257
chimp	L	MDLF	sub-05	Foxy	30	tract_extension	1.6562588702810106
chimp	L	MDLF	sub-05	Foxy	40	tract_extension	1.4704672897196263
chimp	L	MDLF	sub-05	Foxy	50	tract_extension	1.4994807892004154
chimp	L	MDLF	sub-06	Bo	20	dice_coeff	0.6024878312601406
chimp	L	MDLF	sub-06	Bo	30	dice_coeff	0.6256794083578365
chimp	L	MDLF	sub-06	Bo	40	dice_coeff	0.6467801817949046
chimp	L	MDLF	sub-06	Bo	50	dice_coeff	0.6832080716565427
chimp	L	MDLF	sub-06	Bo	20	tract_extension	1.7172351885098742
chimp	L	MDLF	sub-06	Bo	30	tract_extension	1.6374252349757903
chimp	L	MDLF	sub-06	Bo	40	tract_extension	1.5892715756136184
chimp	L	MDLF	sub-06	Bo	50	tract_extension	1.5156720916214588
chimp	L	MDLF	sub-06	Cheeta	20	dice_coeff	0.555155010814708
chimp	L	MDLF	sub-06	Cheeta	30	dice_coeff	0.6020669190627238
chimp	L	MDLF	sub-06	Cheeta	40	dice_coeff	0.6304380325908208
chimp	L	MDLF	sub-06	Cheeta	50	dice_coeff	0.6586448598130842
chimp	L	MDLF	sub-06	Cheeta	20	tract_extension	1.9875324675324675
chimp	L	MDLF	sub-06	Cheeta	30	tract_extension	1.9541128484024473
chimp	L	MDLF	sub-06	Cheeta	40	tract_extension	1.903960161252075
chimp	L	MDLF	sub-06	Cheeta	50	tract_extension	1.7839659453706989
chimp	L	MDLF	sub-06	Lulu	20	dice_coeff	0.6494089480772108
chimp	L	MDLF	sub-06	Lulu	30	dice_coeff	0.6623389796125367
chimp	L	MDLF	sub-06	Lulu	40	dice_coeff	0.6883916083916084
chimp	L	MDLF	sub-06	Lulu	50	dice_coeff	0.7020555434069539
chimp	L	MDLF	sub-06	Lulu	20	tract_extension	1.7631336405529954
chimp	L	MDLF	sub-06	Lulu	30	tract_extension	1.7607963246554363
chimp	L	MDLF	sub-06	Lulu	40	tract_extension	1.6312474603819584
chimp	L	MDLF	sub-06	Lulu	50	tract_extension	1.5664226755957016
chimp	L	MDLF	sub-06	Wenka	20	dice_coeff	0.6474916387959867
chimp	L	MDLF	sub-06	Wenka	30	dice_coeff	0.7189028483744127
chimp	L	MDLF	sub-06	Wenka	40	dice_coeff	0.7416958654519972
chimp	L	MDLF	sub-06	Wenka	50	dice_coeff	0.7666293393057111
chimp	L	MDLF	sub-06	Wenka	20	tract_extension	1.58099173553719
chimp	L	MDLF	sub-06	Wenka	30	tract_extension	1.5338847385272145
chimp	L	MDLF	sub-06	Wenka	40	tract_extension	1.5171957671957672
chimp	L	MDLF	sub-06	Wenka	50	tract_extension	1.4691790826760152
chimp	L	MDLF	sub-06	Foxy	20	dice_coeff	0.6045542904748681
chimp	L	MDLF	sub-06	Foxy	30	dice_coeff	0.6251681075888569
chimp	L	MDLF	sub-06	Foxy	40	dice_coeff	0.7000210216523018
chimp	L	MDLF	sub-06	Foxy	50	dice_coeff	0.7259896729776247
chimp	L	MDLF	sub-06	Foxy	20	tract_extension	1.7574644005512172
chimp	L	MDLF	sub-06	Foxy	30	tract_extension	1.7667486170866626
chimp	L	MDLF	sub-06	Foxy	40	tract_extension	1.6074074074074074
chimp	L	MDLF	sub-06	Foxy	50	tract_extension	1.5896949581160107
chimp	L	MDLF	sub-07	Bo	20	dice_coeff	0.5819088319088319
chimp	L	MDLF	sub-07	Bo	30	dice_coeff	0.6207493702770781
chimp	L	MDLF	sub-07	Bo	40	dice_coeff	0.674969303630942
chimp	L	MDLF	sub-07	Bo	50	dice_coeff	0.7168700042069837
chimp	L	MDLF	sub-07	Bo	20	tract_extension	1.5960832313341493
chimp	L	MDLF	sub-07	Bo	30	tract_extension	1.5290388029419224
chimp	L	MDLF	sub-07	Bo	40	tract_extension	1.3967428967428968
chimp	L	MDLF	sub-07	Bo	50	tract_extension	1.307511737089202
chimp	L	MDLF	sub-07	Cheeta	20	dice_coeff	0.554689599570008
chimp	L	MDLF	sub-07	Cheeta	30	dice_coeff	0.6479317380819886
chimp	L	MDLF	sub-07	Cheeta	40	dice_coeff	0.6759133964817321
chimp	L	MDLF	sub-07	Cheeta	50	dice_coeff	0.7159285786341169
chimp	L	MDLF	sub-07	Cheeta	20	tract_extension	1.8953488372093024
chimp	L	MDLF	sub-07	Cheeta	30	tract_extension	1.7260234755224735
chimp	L	MDLF	sub-07	Cheeta	40	tract_extension	1.614014014014014
chimp	L	MDLF	sub-07	Cheeta	50	tract_extension	1.4127095956037763
chimp	L	MDLF	sub-07	Lulu	20	dice_coeff	0.6628336755646816
chimp	L	MDLF	sub-07	Lulu	30	dice_coeff	0.6637915859883823
chimp	L	MDLF	sub-07	Lulu	40	dice_coeff	0.7383768224766911
chimp	L	MDLF	sub-07	Lulu	50	dice_coeff	0.7495003655861565
chimp	L	MDLF	sub-07	Lulu	20	tract_extension	1.6158612143742255
chimp	L	MDLF	sub-07	Lulu	30	tract_extension	1.5987801644126227
chimp	L	MDLF	sub-07	Lulu	40	tract_extension	1.3664406779661018
chimp	L	MDLF	sub-07	Lulu	50	tract_extension	1.3041103017689906
chimp	L	MDLF	sub-07	Wenka	20	dice_coeff	0.6642839536603402
chimp	L	MDLF	sub-07	Wenka	30	dice_coeff	0.7546312478154491
chimp	L	MDLF	sub-07	Wenka	40	dice_coeff	0.8
chimp	L	MDLF	sub-07	Wenka	50	dice_coeff	0.8046548637358265
chimp	L	MDLF	sub-07	Wenka	20	tract_extension	1.4515769944341372
chimp	L	MDLF	sub-07	Wenka	30	tract_extension	1.3962482630847615
chimp	L	MDLF	sub-07	Wenka	40	tract_extension	1.2919871794871796
chimp	L	MDLF	sub-07	Wenka	50	tract_extension	1.2393077873918419
chimp	L	MDLF	sub-07	Foxy	20	dice_coeff	0.5890899821565129
chimp	L	MDLF	sub-07	Foxy	30	dice_coeff	0.6538065843621399
chimp	L	MDLF	sub-07	Foxy	40	dice_coeff	0.7743330930064888
chimp	L	MDLF	sub-07	Foxy	50	dice_coeff	0.7940954638508781
chimp	L	MDLF	sub-07	Foxy	20	tract_extension	1.6927736910428386
chimp	L	MDLF	sub-07	Foxy	30	tract_extension	1.5811696826645685
chimp	L	MDLF	sub-07	Foxy	40	tract_extension	1.3648213983409514
chimp	L	MDLF	sub-07	Foxy	50	tract_extension	1.3603799185888739
chimp	L	MDLF	sub-08	Bo	20	dice_coeff	0.5748978915995143
chimp	L	MDLF	sub-08	Bo	30	dice_coeff	0.6312236286919831
chimp	L	MDLF	sub-08	Bo	40	dice_coeff	0.6354534746760895
chimp	L	MDLF	sub-08	Bo	50	dice_coeff	0.669588934346386
chimp	L	MDLF	sub-08	Bo	20	tract_extension	1.4946236559139785
chimp	L	MDLF	sub-08	Bo	30	tract_extension	1.3974234321827905
chimp	L	MDLF	sub-08	Bo	40	tract_extension	1.4715477293790546
chimp	L	MDLF	sub-08	Bo	50	tract_extension	1.4393366307826594
chimp	L	MDLF	sub-08	Cheeta	20	dice_coeff	0.577737603305785
chimp	L	MDLF	sub-08	Cheeta	30	dice_coeff	0.6657486459193978
chimp	L	MDLF	sub-08	Cheeta	40	dice_coeff	0.6541584225967115
chimp	L	MDLF	sub-08	Cheeta	50	dice_coeff	0.6643517281906085
chimp	L	MDLF	sub-08	Cheeta	20	tract_extension	1.739830129637908
chimp	L	MDLF	sub-08	Cheeta	30	tract_extension	1.5854936569222284
chimp	L	MDLF	sub-08	Cheeta	40	tract_extension	1.6560283687943262
chimp	L	MDLF	sub-08	Cheeta	50	tract_extension	1.5911868768092634
chimp	L	MDLF	sub-08	Lulu	20	dice_coeff	0.670974411992763
chimp	L	MDLF	sub-08	Lulu	30	dice_coeff	0.6844216816047801
chimp	L	MDLF	sub-08	Lulu	40	dice_coeff	0.6843233699079329
chimp	L	MDLF	sub-08	Lulu	50	dice_coeff	0.6879697326039165
chimp	L	MDLF	sub-08	Lulu	20	tract_extension	1.4992295839753467
chimp	L	MDLF	sub-08	Lulu	30	tract_extension	1.4340234472437017
chimp	L	MDLF	sub-08	Lulu	40	tract_extension	1.4631404349428676
chimp	L	MDLF	sub-08	Lulu	50	tract_extension	1.4705707491082045
chimp	L	MDLF	sub-08	Wenka	20	dice_coeff	0.6967787947224533
chimp	L	MDLF	sub-08	Wenka	30	dice_coeff	0.7739515854074327
chimp	L	MDLF	sub-08	Wenka	40	dice_coeff	0.7692705304645603
chimp	L	MDLF	sub-08	Wenka	50	dice_coeff	0.7687703454793657
chimp	L	MDLF	sub-08	Wenka	20	tract_extension	1.3278744455817126
chimp	L	MDLF	sub-08	Wenka	30	tract_extension	1.2662995594713657
chimp	L	MDLF	sub-08	Wenka	40	tract_extension	1.3336133042163616
chimp	L	MDLF	sub-08	Wenka	50	tract_extension	1.351454719300642
chimp	L	MDLF	sub-08	Foxy	20	dice_coeff	0.5957292797683676
chimp	L	MDLF	sub-08	Foxy	30	dice_coeff	0.665988470668023
chimp	L	MDLF	sub-08	Foxy	40	dice_coeff	0.7041099511034756
chimp	L	MDLF	sub-08	Foxy	50	dice_coeff	0.7237090505274847
chimp	L	MDLF	sub-08	Foxy	20	tract_extension	1.5763466990684487
chimp	L	MDLF	sub-08	Foxy	30	tract_extension	1.4635947046843176
chimp	L	MDLF	sub-08	Foxy	40	tract_extension	1.4900525525525525
chimp	L	MDLF	sub-08	Foxy	50	tract_extension	1.518183213134878
chimp	L	MDLF	sub-09	Bo	20	dice_coeff	0.5857413249211356
chimp	L	MDLF	sub-09	Bo	30	dice_coeff	0.6153195090986034
chimp	L	MDLF	sub-09	Bo	40	dice_coeff	0.650486038016222
chimp	L	MDLF	sub-09	Bo	50	dice_coeff	0.7118217054263567
chimp	L	MDLF	sub-09	Bo	20	tract_extension	1.7432141318397243
chimp	L	MDLF	sub-09	Bo	30	tract_extension	1.5724896836313618
chimp	L	MDLF	sub-09	Bo	40	tract_extension	1.515705311250714
chimp	L	MDLF	sub-09	Bo	50	tract_extension	1.361557310100735
chimp	L	MDLF	sub-09	Cheeta	20	dice_coeff	0.6066584463625154
chimp	L	MDLF	sub-09	Cheeta	30	dice_coeff	0.6568229115053017
chimp	L	MDLF	sub-09	Cheeta	40	dice_coeff	0.6515876468029578
chimp	L	MDLF	sub-09	Cheeta	50	dice_coeff	0.6821054868008711
chimp	L	MDLF	sub-09	Cheeta	20	tract_extension	1.8274616079494128
chimp	L	MDLF	sub-09	Cheeta	30	tract_extension	1.7248038624019313
chimp	L	MDLF	sub-09	Cheeta	40	tract_extension	1.7716955941255006
chimp	L	MDLF	sub-09	Cheeta	50	tract_extension	1.5577012926335463
chimp	L	MDLF	sub-09	Lulu	20	dice_coeff	0.5827195467422097
chimp	L	MDLF	sub-09	Lulu	30	dice_coeff	0.637745286648711
chimp	L	MDLF	sub-09	Lulu	40	dice_coeff	0.7166812579971715
chimp	L	MDLF	sub-09	Lulu	50	dice_coeff	0.7309706615142116
chimp	L	MDLF	sub-09	Lulu	20	tract_extension	1.9669421487603307
chimp	L	MDLF	sub-09	Lulu	30	tract_extension	1.7242835595776773
chimp	L	MDLF	sub-09	Lulu	40	tract_extension	1.4963352753241872
chimp	L	MDLF	sub-09	Lulu	50	tract_extension	1.3914858096828047
chimp	L	MDLF	sub-09	Wenka	20	dice_coeff	0.7119289340101522
chimp	L	MDLF	sub-09	Wenka	30	dice_coeff	0.7567265617726469
chimp	L	MDLF	sub-09	Wenka	40	dice_coeff	0.7649938800489596
chimp	L	MDLF	sub-09	Wenka	50	dice_coeff	0.7965960112770178
chimp	L	MDLF	sub-09	Wenka	20	tract_extension	1.4424242424242424
chimp	L	MDLF	sub-09	Wenka	30	tract_extension	1.406496062992126
chimp	L	MDLF	sub-09	Wenka	40	tract_extension	1.4154666666666667
chimp	L	MDLF	sub-09	Wenka	50	tract_extension	1.3110499410145497
chimp	L	MDLF	sub-09	Foxy	20	dice_coeff	0.5580721622333421
chimp	L	MDLF	sub-09	Foxy	30	dice_coeff	0.6328533431165735
chimp	L	MDLF	sub-09	Foxy	40	dice_coeff	0.7300343642611683
chimp	L	MDLF	sub-09	Foxy	50	dice_coeff	0.7654266475328404
chimp	L	MDLF	sub-09	Foxy	20	tract_extension	1.9093912222746579
chimp	L	MDLF	sub-09	Foxy	30	tract_extension	1.6568115942028985
chimp	L	MDLF	sub-09	Foxy	40	tract_extension	1.4991527019393711
chimp	L	MDLF	sub-09	Foxy	50	tract_extension	1.4424574560138448
chimp	L	MDLF	sub-11	Bo	20	dice_coeff	0.5906780891534775
chimp	L	MDLF	sub-11	Bo	30	dice_coeff	0.6104750743712251
chimp	L	MDLF	sub-11	Bo	40	dice_coeff	0.6712989045383412
chimp	L	MDLF	sub-11	Bo	50	dice_coeff	0.712457975345536
chimp	L	MDLF	sub-11	Bo	20	tract_extension	1.8751229105211407
chimp	L	MDLF	sub-11	Bo	30	tract_extension	1.7501476668635558
chimp	L	MDLF	sub-11	Bo	40	tract_extension	1.504662439388288
chimp	L	MDLF	sub-11	Bo	50	tract_extension	1.3172106435968016
chimp	L	MDLF	sub-11	Cheeta	20	dice_coeff	0.5480535279805353
chimp	L	MDLF	sub-11	Cheeta	30	dice_coeff	0.6291675189200245
chimp	L	MDLF	sub-11	Cheeta	40	dice_coeff	0.6781895415262927
chimp	L	MDLF	sub-11	Cheeta	50	dice_coeff	0.711572371404101
chimp	L	MDLF	sub-11	Cheeta	20	tract_extension	2.1165371809101
chimp	L	MDLF	sub-11	Cheeta	30	tract_extension	1.9265279583875163
chimp	L	MDLF	sub-11	Cheeta	40	tract_extension	1.742548596112311
chimp	L	MDLF	sub-11	Cheeta	50	tract_extension	1.4229679977343528
chimp	L	MDLF	sub-11	Lulu	20	dice_coeff	0.5964470995126553
chimp	L	MDLF	sub-11	Lulu	30	dice_coeff	0.6322144903806796
chimp	L	MDLF	sub-11	Lulu	40	dice_coeff	0.7020302139585753
chimp	L	MDLF	sub-11	Lulu	50	dice_coeff	0.7346382315707469
chimp	L	MDLF	sub-11	Lulu	20	tract_extension	2.0105429625724827
chimp	L	MDLF	sub-11	Lulu	30	tract_extension	1.9184202007122046
chimp	L	MDLF	sub-11	Lulu	40	tract_extension	1.5711781888997078
chimp	L	MDLF	sub-11	Lulu	50	tract_extension	1.3320519618239661
chimp	L	MDLF	sub-11	Wenka	20	dice_coeff	0.6633663366336634
chimp	L	MDLF	sub-11	Wenka	30	dice_coeff	0.7374365846654541
chimp	L	MDLF	sub-11	Wenka	40	dice_coeff	0.7683646848826033
chimp	L	MDLF	sub-11	Wenka	50	dice_coeff	0.7849585216829765
chimp	L	MDLF	sub-11	Wenka	20	tract_extension	1.6264392324093817
chimp	L	MDLF	sub-11	Wenka	30	tract_extension	1.5384215991692627
chimp	L	MDLF	sub-11	Wenka	40	tract_extension	1.4417441029306648
chimp	L	MDLF	sub-11	Wenka	50	tract_extension	1.2718643209720288
chimp	L	MDLF	sub-11	Foxy	20	dice_coeff	0.5800498022557492
chimp	L	MDLF	sub-11	Foxy	30	dice_coeff	0.6238496561077206
chimp	L	MDLF	sub-11	Foxy	40	dice_coeff	0.7169681071379264
chimp	L	MDLF	sub-11	Foxy	50	dice_coeff	0.7753564702717245
chimp	L	MDLF	sub-11	Foxy	20	tract_extension	1.9262626262626263
chimp	L	MDLF	sub-11	Foxy	30	tract_extension	1.8403726708074535
chimp	L	MDLF	sub-11	Foxy	40	tract_extension	1.553629886385519
chimp	L	MDLF	sub-11	Foxy	50	tract_extension	1.3947258848022206
chimp	L	MDLF	sub-12	Bo	20	dice_coeff	0.6457843904985643
chimp	L	MDLF	sub-12	Bo	30	dice_coeff	0.6971598932998587
chimp	L	MDLF	sub-12	Bo	40	dice_coeff	0.6928684242497873
chimp	L	MDLF	sub-12	Bo	50	dice_coeff	0.7180991493106482
chimp	L	MDLF	sub-12	Bo	20	tract_extension	1.5291026677445432
chimp	L	MDLF	sub-12	Bo	30	tract_extension	1.3664190862030159
chimp	L	MDLF	sub-12	Bo	40	tract_extension	1.3992635455023672
chimp	L	MDLF	sub-12	Bo	50	tract_extension	1.3711873638344227
chimp	L	MDLF	sub-12	Cheeta	20	dice_coeff	0.6409891984081865
chimp	L	MDLF	sub-12	Cheeta	30	dice_coeff	0.7293052475979305
chimp	L	MDLF	sub-12	Cheeta	40	dice_coeff	0.6919417820376287
chimp	L	MDLF	sub-12	Cheeta	50	dice_coeff	0.7073157582619009
chimp	L	MDLF	sub-12	Cheeta	20	tract_extension	1.6776053215077604
chimp	L	MDLF	sub-12	Cheeta	30	tract_extension	1.5381302254877123
chimp	L	MDLF	sub-12	Cheeta	40	tract_extension	1.6375949107326082
chimp	L	MDLF	sub-12	Cheeta	50	tract_extension	1.5350609756097562
chimp	L	MDLF	sub-12	Lulu	20	dice_coeff	0.6732381933205827
chimp	L	MDLF	sub-12	Lulu	30	dice_coeff	0.722378112942827
chimp	L	MDLF	sub-12	Lulu	40	dice_coeff	0.7221164576905402
chimp	L	MDLF	sub-12	Lulu	50	dice_coeff	0.7192016871560105
chimp	L	MDLF	sub-12	Lulu	20	tract_extension	1.6534090909090908
chimp	L	MDLF	sub-12	Lulu	30	tract_extension	1.4739014323865016
chimp	L	MDLF	sub-12	Lulu	40	tract_extension	1.450909090909091
chimp	L	MDLF	sub-12	Lulu	50	tract_extension	1.4404234015162352
chimp	L	MDLF	sub-12	Wenka	20	dice_coeff	0.7107785217277143
chimp	L	MDLF	sub-12	Wenka	30	dice_coeff	0.8095072261884032
chimp	L	MDLF	sub-12	Wenka	40	dice_coeff	0.7865857723848256
chimp	L	MDLF	sub-12	Wenka	50	dice_coeff	0.7963647891789074
chimp	L	MDLF	sub-12	Wenka	20	tract_extension	1.3974879940893978
chimp	L	MDLF	sub-12	Wenka	30	tract_extension	1.305872230587223
chimp	L	MDLF	sub-12	Wenka	40	tract_extension	1.3527716562129175
chimp	L	MDLF	sub-12	Wenka	50	tract_extension	1.3362526539278132
chimp	L	MDLF	sub-12	Foxy	20	dice_coeff	0.6432955940526531
chimp	L	MDLF	sub-12	Foxy	30	dice_coeff	0.7223645993507603
chimp	L	MDLF	sub-12	Foxy	40	dice_coeff	0.7386825698021143
chimp	L	MDLF	sub-12	Foxy	50	dice_coeff	0.7588652482269503
chimp	L	MDLF	sub-12	Foxy	20	tract_extension	1.604325699745547
chimp	L	MDLF	sub-12	Foxy	30	tract_extension	1.435903500473037
chimp	L	MDLF	sub-12	Foxy	40	tract_extension	1.4642201834862385
chimp	L	MDLF	sub-12	Foxy	50	tract_extension	1.470502336448598
chimp	L	MDLF	sub-13	Bo	20	dice_coeff	0.6465639963763428
chimp	L	MDLF	sub-13	Bo	30	dice_coeff	0.6450134991409637
chimp	L	MDLF	sub-13	Bo	40	dice_coeff	0.650895370425825
chimp	L	MDLF	sub-13	Bo	50	dice_coeff	0.6871690229801293
chimp	L	MDLF	sub-13	Bo	20	tract_extension	1.5404323458767013
chimp	L	MDLF	sub-13	Bo	30	tract_extension	1.4822425164890918
chimp	L	MDLF	sub-13	Bo	40	tract_extension	1.4600662495399337
chimp	L	MDLF	sub-13	Bo	50	tract_extension	1.40625
chimp	L	MDLF	sub-13	Cheeta	20	dice_coeff	0.6872271511054782
chimp	L	MDLF	sub-13	Cheeta	30	dice_coeff	0.7060632266743538
chimp	L	MDLF	sub-13	Cheeta	40	dice_coeff	0.6804411559402485
chimp	L	MDLF	sub-13	Cheeta	50	dice_coeff	0.684283431006926
chimp	L	MDLF	sub-13	Cheeta	20	tract_extension	1.5770491803278688
chimp	L	MDLF	sub-13	Cheeta	30	tract_extension	1.590364725095264
chimp	L	MDLF	sub-13	Cheeta	40	tract_extension	1.62782109150595
chimp	L	MDLF	sub-13	Cheeta	50	tract_extension	1.548582995951417
chimp	L	MDLF	sub-13	Lulu	20	dice_coeff	0.6592830078694258
chimp	L	MDLF	sub-13	Lulu	30	dice_coeff	0.6755735741269695
chimp	L	MDLF	sub-13	Lulu	40	dice_coeff	0.6940168738326786
chimp	L	MDLF	sub-13	Lulu	50	dice_coeff	0.6978072412034676
chimp	L	MDLF	sub-13	Lulu	20	tract_extension	1.7011494252873562
chimp	L	MDLF	sub-13	Lulu	30	tract_extension	1.593835242771413
chimp	L	MDLF	sub-13	Lulu	40	tract_extension	1.4725315515961395
chimp	L	MDLF	sub-13	Lulu	50	tract_extension	1.4535223618824904
chimp	L	MDLF	sub-13	Wenka	20	dice_coeff	0.7690705545430877
chimp	L	MDLF	sub-13	Wenka	30	dice_coeff	0.7992410552945428
chimp	L	MDLF	sub-13	Wenka	40	dice_coeff	0.7855310753041763
chimp	L	MDLF	sub-13	Wenka	50	dice_coeff	0.7886055401371944
chimp	L	MDLF	sub-13	Wenka	20	tract_extension	1.3026404874746107
chimp	L	MDLF	sub-13	Wenka	30	tract_extension	1.3210490617228126
chimp	L	MDLF	sub-13	Wenka	40	tract_extension	1.3285331547220363
chimp	L	MDLF	sub-13	Wenka	50	tract_extension	1.3207171314741035
chimp	L	MDLF	sub-13	Foxy	20	dice_coeff	0.6189832341806383
chimp	L	MDLF	sub-13	Foxy	30	dice_coeff	0.6452528837622006
chimp	L	MDLF	sub-13	Foxy	40	dice_coeff	0.6981978964292892
chimp	L	MDLF	sub-13	Foxy	50	dice_coeff	0.7222191462266763
chimp	L	MDLF	sub-13	Foxy	20	tract_extension	1.6810834425513324
chimp	L	MDLF	sub-13	Foxy	30	tract_extension	1.606985698569857
chimp	L	MDLF	sub-13	Foxy	40	tract_extension	1.5225484551909423
chimp	L	MDLF	sub-13	Foxy	50	tract_extension	1.5248390064397424
chimp	L	MDLF	sub-14	Bo	20	dice_coeff	0.5602803738317758
chimp	L	MDLF	sub-14	Bo	30	dice_coeff	0.6399004562422231
chimp	L	MDLF	sub-14	Bo	40	dice_coeff	0.6732097419120319
chimp	L	MDLF	sub-14	Bo	50	dice_coeff	0.7052948021722265
chimp	L	MDLF	sub-14	Bo	20	tract_extension	1.688073394495413
chimp	L	MDLF	sub-14	Bo	30	tract_extension	1.5442053409385532
chimp	L	MDLF	sub-14	Bo	40	tract_extension	1.4442044636429086
chimp	L	MDLF	sub-14	Bo	50	tract_extension	1.3730235116183143
chimp	L	MDLF	sub-14	Cheeta	20	dice_coeff	0.5449986803906044
chimp	L	MDLF	sub-14	Cheeta	30	dice_coeff	0.64640402671571
chimp	L	MDLF	sub-14	Cheeta	40	dice_coeff	0.65425720150046
chimp	L	MDLF	sub-14	Cheeta	50	dice_coeff	0.6782201903141779
chimp	L	MDLF	sub-14	Cheeta	20	tract_extension	1.9602905569007263
chimp	L	MDLF	sub-14	Cheeta	30	tract_extension	1.7837675950883498
chimp	L	MDLF	sub-14	Cheeta	40	tract_extension	1.7360450021635656
chimp	L	MDLF	sub-14	Cheeta	50	tract_extension	1.5654491299576736
chimp	L	MDLF	sub-14	Lulu	20	dice_coeff	0.638623840881602
chimp	L	MDLF	sub-14	Lulu	30	dice_coeff	0.6658518239939828
chimp	L	MDLF	sub-14	Lulu	40	dice_coeff	0.7201675721673102
chimp	L	MDLF	sub-14	Lulu	50	dice_coeff	0.7178260648313063
chimp	L	MDLF	sub-14	Lulu	20	tract_extension	1.7037037037037037
chimp	L	MDLF	sub-14	Lulu	30	tract_extension	1.682010731431799
chimp	L	MDLF	sub-14	Lulu	40	tract_extension	1.4586438829303763
chimp	L	MDLF	sub-14	Lulu	50	tract_extension	1.4158514107471998
chimp	L	MDLF	sub-14	Wenka	20	dice_coeff	0.6673939393939394
chimp	L	MDLF	sub-14	Wenka	30	dice_coeff	0.7651397869046535
chimp	L	MDLF	sub-14	Wenka	40	dice_coeff	0.7748454430632188
chimp	L	MDLF	sub-14	Wenka	50	dice_coeff	0.7835719510920682
chimp	L	MDLF	sub-14	Wenka	20	tract_extension	1.4703959317108608
chimp	L	MDLF	sub-14	Wenka	30	tract_extension	1.4177576767436324
chimp	L	MDLF	sub-14	Wenka	40	tract_extension	1.3768016472203157
chimp	L	MDLF	sub-14	Wenka	50	tract_extension	1.331821819151774
chimp	L	MDLF	sub-14	Foxy	20	dice_coeff	0.5717865196692559
chimp	L	MDLF	sub-14	Foxy	30	dice_coeff	0.6581710490891143
chimp	L	MDLF	sub-14	Foxy	40	dice_coeff	0.7274324324324324
chimp	L	MDLF	sub-14	Foxy	50	dice_coeff	0.7297536183847089
chimp	L	MDLF	sub-14	Foxy	20	tract_extension	1.7738825591586327
chimp	L	MDLF	sub-14	Foxy	30	tract_extension	1.6242159803654213
chimp	L	MDLF	sub-14	Foxy	40	tract_extension	1.4906186141556752
chimp	L	MDLF	sub-14	Foxy	50	tract_extension	1.511884935654807
chimp	L	MDLF	sub-15	Bo	20	dice_coeff	0.593699774991964
chimp	L	MDLF	sub-15	Bo	30	dice_coeff	0.6262480699948534
chimp	L	MDLF	sub-15	Bo	40	dice_coeff	0.6516417050691244
chimp	L	MDLF	sub-15	Bo	50	dice_coeff	0.691838417147568
chimp	L	MDLF	sub-15	Bo	20	tract_extension	2.1034109366540337
chimp	L	MDLF	sub-15	Bo	30	tract_extension	1.918474687705457
chimp	L	MDLF	sub-15	Bo	40	tract_extension	1.7213259668508287
chimp	L	MDLF	sub-15	Bo	50	tract_extension	1.5897680330473467
chimp	L	MDLF	sub-15	Cheeta	20	dice_coeff	0.5846410684474124
chimp	L	MDLF	sub-15	Cheeta	30	dice_coeff	0.6324128066894047
chimp	L	MDLF	sub-15	Cheeta	40	dice_coeff	0.6476487997369286
chimp	L	MDLF	sub-15	Cheeta	50	dice_coeff	0.6486930167950499
chimp	L	MDLF	sub-15	Cheeta	20	tract_extension	2.218732153055397
chimp	L	MDLF	sub-15	Cheeta	30	tract_extension	2.0306193458594293
chimp	L	MDLF	sub-15	Cheeta	40	tract_extension	1.9774054328509774
chimp	L	MDLF	sub-15	Cheeta	50	tract_extension	1.94782947245474
chimp	L	MDLF	sub-15	Lulu	20	dice_coeff	0.5375862068965517
chimp	L	MDLF	sub-15	Lulu	30	dice_coeff	0.6092655367231639
chimp	L	MDLF	sub-15	Lulu	40	dice_coeff	0.6457614884914589
chimp	L	MDLF	sub-15	Lulu	50	dice_coeff	0.706091280412005
chimp	L	MDLF	sub-15	Lulu	20	tract_extension	2.491982039769083
chimp	L	MDLF	sub-15	Lulu	30	tract_extension	2.164688427299703
chimp	L	MDLF	sub-15	Lulu	40	tract_extension	1.9346746150024838
chimp	L	MDLF	sub-15	Lulu	50	tract_extension	1.6777330650570088
chimp	L	MDLF	sub-15	Wenka	20	dice_coeff	0.6362087656806567
chimp	L	MDLF	sub-15	Wenka	30	dice_coeff	0.7211995863495346
chimp	L	MDLF	sub-15	Wenka	40	dice_coeff	0.7217106289995318
chimp	L	MDLF	sub-15	Wenka	50	dice_coeff	0.7338507462686567
chimp	L	MDLF	sub-15	Wenka	20	tract_extension	1.89143135345667
chimp	L	MDLF	sub-15	Wenka	30	tract_extension	1.6736449670203613
chimp	L	MDLF	sub-15	Wenka	40	tract_extension	1.6844723183391004
chimp	L	MDLF	sub-15	Wenka	50	tract_extension	1.6280507647250244
chimp	L	MDLF	sub-15	Foxy	20	dice_coeff	0.5754579348354677
chimp	L	MDLF	sub-15	Foxy	30	dice_coeff	0.6089087809036658
chimp	L	MDLF	sub-15	Foxy	40	dice_coeff	0.6929716399506781
chimp	L	MDLF	sub-15	Foxy	50	dice_coeff	0.7279739664939134
chimp	L	MDLF	sub-15	Foxy	20	tract_extension	2.1887323943661974
chimp	L	MDLF	sub-15	Foxy	30	tract_extension	2.0427021351067554
chimp	L	MDLF	sub-15	Foxy	40	tract_extension	1.7324288256227758
chimp	L	MDLF	sub-15	Foxy	50	tract_extension	1.6566225165562913
chimp	L	MDLF	sub-16	Bo	20	dice_coeff	0.5587236931432451
chimp	L	MDLF	sub-16	Bo	30	dice_coeff	0.6153606723212202
chimp	L	MDLF	sub-16	Bo	40	dice_coeff	0.679174703372494
chimp	L	MDLF	sub-16	Bo	50	dice_coeff	0.7266017805249319
chimp	L	MDLF	sub-16	Bo	20	tract_extension	1.6152288375860673
chimp	L	MDLF	sub-16	Bo	30	tract_extension	1.482802225594335
chimp	L	MDLF	sub-16	Bo	40	tract_extension	1.3886402753872633
chimp	L	MDLF	sub-16	Bo	50	tract_extension	1.2855510411376334
chimp	L	MDLF	sub-16	Cheeta	20	dice_coeff	0.5521744808671804
chimp	L	MDLF	sub-16	Cheeta	30	dice_coeff	0.6326511714047597
chimp	L	MDLF	sub-16	Cheeta	40	dice_coeff	0.6550791289057216
chimp	L	MDLF	sub-16	Cheeta	50	dice_coeff	0.6991990507267873
chimp	L	MDLF	sub-16	Cheeta	20	tract_extension	1.8864711447492903
chimp	L	MDLF	sub-16	Cheeta	30	tract_extension	1.7163348946135832
chimp	L	MDLF	sub-16	Cheeta	40	tract_extension	1.665909560189965
chimp	L	MDLF	sub-16	Cheeta	50	tract_extension	1.4319049639372083
chimp	L	MDLF	sub-16	Lulu	20	dice_coeff	0.6367701209889531
chimp	L	MDLF	sub-16	Lulu	30	dice_coeff	0.673913043478261
chimp	L	MDLF	sub-16	Lulu	40	dice_coeff	0.7210858822793519
chimp	L	MDLF	sub-16	Lulu	50	dice_coeff	0.7424191616766467
chimp	L	MDLF	sub-16	Lulu	20	tract_extension	1.6472532011565468
chimp	L	MDLF	sub-16	Lulu	30	tract_extension	1.5130322580645161
chimp	L	MDLF	sub-16	Lulu	40	tract_extension	1.3997224149895906
chimp	L	MDLF	sub-16	Lulu	50	tract_extension	1.3066202090592334
chimp	L	MDLF	sub-16	Wenka	20	dice_coeff	0.6759923481587756
chimp	L	MDLF	sub-16	Wenka	30	dice_coeff	0.7520402847716617
chimp	L	MDLF	sub-16	Wenka	40	dice_coeff	0.7797001153402539
chimp	L	MDLF	sub-16	Wenka	50	dice_coeff	0.7951818979810786
chimp	L	MDLF	sub-16	Wenka	20	tract_extension	1.4106827025114963
chimp	L	MDLF	sub-16	Wenka	30	tract_extension	1.3537289309628262
chimp	L	MDLF	sub-16	Wenka	40	tract_extension	1.3261012491781723
chimp	L	MDLF	sub-16	Wenka	50	tract_extension	1.2418741567521159
chimp	L	MDLF	sub-16	Foxy	20	dice_coeff	0.5757836508912109
chimp	L	MDLF	sub-16	Foxy	30	dice_coeff	0.6662689619907959
chimp	L	MDLF	sub-16	Foxy	40	dice_coeff	0.7353731245495643
chimp	L	MDLF	sub-16	Foxy	50	dice_coeff	0.7647090087695987
chimp	L	MDLF	sub-16	Foxy	20	tract_extension	1.7028181041844577
chimp	L	MDLF	sub-16	Foxy	30	tract_extension	1.4998720900486058
chimp	L	MDLF	sub-16	Foxy	40	tract_extension	1.4376336421952958
chimp	L	MDLF	sub-16	Foxy	50	tract_extension	1.4074228523769807
chimp	L	MDLF	sub-17	Bo	20	dice_coeff	0.5637140101942416
chimp	L	MDLF	sub-17	Bo	30	dice_coeff	0.5691521607343899
chimp	L	MDLF	sub-17	Bo	40	dice_coeff	0.6253517603652055
chimp	L	MDLF	sub-17	Bo	50	dice_coeff	0.684456243134383
chimp	L	MDLF	sub-17	Bo	20	tract_extension	1.9227761485826003
chimp	L	MDLF	sub-17	Bo	30	tract_extension	1.8481436396835058
chimp	L	MDLF	sub-17	Bo	40	tract_extension	1.6168
chimp	L	MDLF	sub-17	Bo	50	tract_extension	1.3534840176541394
chimp	L	MDLF	sub-17	Cheeta	20	dice_coeff	0.52
chimp	L	MDLF	sub-17	Cheeta	30	dice_coeff	0.5803704070515995
chimp	L	MDLF	sub-17	Cheeta	40	dice_coeff	0.6311631309436723
chimp	L	MDLF	sub-17	Cheeta	50	dice_coeff	0.683221934917305
chimp	L	MDLF	sub-17	Cheeta	20	tract_extension	2.192865105908584
chimp	L	MDLF	sub-17	Cheeta	30	tract_extension	2.0726962457337885
chimp	L	MDLF	sub-17	Cheeta	40	tract_extension	1.873898933704219
chimp	L	MDLF	sub-17	Cheeta	50	tract_extension	1.445301342473579
chimp	L	MDLF	sub-17	Lulu	20	dice_coeff	0.5291899230653191
chimp	L	MDLF	sub-17	Lulu	30	dice_coeff	0.5772365707551802
chimp	L	MDLF	sub-17	Lulu	40	dice_coeff	0.6451348583134175
chimp	L	MDLF	sub-17	Lulu	50	dice_coeff	0.6856196783349101
chimp	L	MDLF	sub-17	Lulu	20	tract_extension	2.2428734321550743
chimp	L	MDLF	sub-17	Lulu	30	tract_extension	2.066349098332766
chimp	L	MDLF	sub-17	Lulu	40	tract_extension	1.7112616426756986
chimp	L	MDLF	sub-17	Lulu	50	tract_extension	1.3964399061680695
chimp	L	MDLF	sub-17	Wenka	20	dice_coeff	0.6026840178934526
chimp	L	MDLF	sub-17	Wenka	30	dice_coeff	0.6944470281834249
chimp	L	MDLF	sub-17	Wenka	40	dice_coeff	0.7344671512824029
chimp	L	MDLF	sub-17	Wenka	50	dice_coeff	0.7572656963059039
chimp	L	MDLF	sub-17	Wenka	20	tract_extension	1.769680611785875
chimp	L	MDLF	sub-17	Wenka	30	tract_extension	1.6268416822930618
chimp	L	MDLF	sub-17	Wenka	40	tract_extension	1.5096171802054155
chimp	L	MDLF	sub-17	Wenka	50	tract_extension	1.283938086780005
chimp	L	MDLF	sub-17	Foxy	20	dice_coeff	0.5532153889356922
chimp	L	MDLF	sub-17	Foxy	30	dice_coeff	0.6007080305571083
chimp	L	MDLF	sub-17	Foxy	40	dice_coeff	0.6659771066059854
chimp	L	MDLF	sub-17	Foxy	50	dice_coeff	0.743158449775903
chimp	L	MDLF	sub-17	Foxy	20	tract_extension	1.9969543147208122
chimp	L	MDLF	sub-17	Foxy	30	tract_extension	1.8836848635235732
chimp	L	MDLF	sub-17	Foxy	40	tract_extension	1.674052598881756
chimp	L	MDLF	sub-17	Foxy	50	tract_extension	1.4360720874130837
chimp	L	MDLF	sub-18	Bo	20	dice_coeff	0.6330429466605533
chimp	L	MDLF	sub-18	Bo	30	dice_coeff	0.6275589828330121
chimp	L	MDLF	sub-18	Bo	40	dice_coeff	0.6744506395539522
chimp	L	MDLF	sub-18	Bo	50	dice_coeff	0.7128281432670848
chimp	L	MDLF	sub-18	Bo	20	tract_extension	1.852728150651859
chimp	L	MDLF	sub-18	Bo	30	tract_extension	1.7679929783499122
chimp	L	MDLF	sub-18	Bo	40	tract_extension	1.5481423847500486
chimp	L	MDLF	sub-18	Bo	50	tract_extension	1.4577307290890116
chimp	L	MDLF	sub-18	Cheeta	20	dice_coeff	0.5673169171730092
chimp	L	MDLF	sub-18	Cheeta	30	dice_coeff	0.6126441515650741
chimp	L	MDLF	sub-18	Cheeta	40	dice_coeff	0.6648859039914523
chimp	L	MDLF	sub-18	Cheeta	50	dice_coeff	0.6906335253107002
chimp	L	MDLF	sub-18	Cheeta	20	tract_extension	2.1629086809470124
chimp	L	MDLF	sub-18	Cheeta	30	tract_extension	2.0312605042016805
chimp	L	MDLF	sub-18	Cheeta	40	tract_extension	1.8271349862258952
chimp	L	MDLF	sub-18	Cheeta	50	tract_extension	1.7164676966292134
chimp	L	MDLF	sub-18	Lulu	20	dice_coeff	0.6151055408970977
chimp	L	MDLF	sub-18	Lulu	30	dice_coeff	0.657832073713635
chimp	L	MDLF	sub-18	Lulu	40	dice_coeff	0.6967324955116697
chimp	L	MDLF	sub-18	Lulu	50	dice_coeff	0.7171112115732369
chimp	L	MDLF	sub-18	Lulu	20	tract_extension	2.057372654155496
chimp	L	MDLF	sub-18	Lulu	30	tract_extension	1.9021089077746303
chimp	L	MDLF	sub-18	Lulu	40	tract_extension	1.6406926406926408
chimp	L	MDLF	sub-18	Lulu	50	tract_extension	1.5408983451536642
chimp	L	MDLF	sub-18	Wenka	20	dice_coeff	0.6632078268603617
chimp	L	MDLF	sub-18	Wenka	30	dice_coeff	0.7240618101545254
chimp	L	MDLF	sub-18	Wenka	40	dice_coeff	0.7485296227227084
chimp	L	MDLF	sub-18	Wenka	50	dice_coeff	0.7805948599480219
chimp	L	MDLF	sub-18	Wenka	20	tract_extension	1.7152436298614215
chimp	L	MDLF	sub-18	Wenka	30	tract_extension	1.602067868504772
chimp	L	MDLF	sub-18	Wenka	40	tract_extension	1.5252970486776543
chimp	L	MDLF	sub-18	Wenka	50	tract_extension	1.4467298017164842
chimp	L	MDLF	sub-18	Foxy	20	dice_coeff	0.6494782074892572
chimp	L	MDLF	sub-18	Foxy	30	dice_coeff	0.6264965652600588
chimp	L	MDLF	sub-18	Foxy	40	dice_coeff	0.7048407825217764
chimp	L	MDLF	sub-18	Foxy	50	dice_coeff	0.7312043365543248
chimp	L	MDLF	sub-18	Foxy	20	tract_extension	1.813327032136106
chimp	L	MDLF	sub-18	Foxy	30	tract_extension	1.893170426065163
chimp	L	MDLF	sub-18	Foxy	40	tract_extension	1.6124392220421393
chimp	L	MDLF	sub-18	Foxy	50	tract_extension	1.5756647864625302
chimp	L	MDLF	sub-19	Bo	20	dice_coeff	0.540125610607118
chimp	L	MDLF	sub-19	Bo	30	dice_coeff	0.5968771632951312
chimp	L	MDLF	sub-19	Bo	40	dice_coeff	0.6382834556747601
chimp	L	MDLF	sub-19	Bo	50	dice_coeff	0.680747285109516
chimp	L	MDLF	sub-19	Bo	20	tract_extension	1.6141257536606375
chimp	L	MDLF	sub-19	Bo	30	tract_extension	1.5497422680412372
chimp	L	MDLF	sub-19	Bo	40	tract_extension	1.4301132342533616
chimp	L	MDLF	sub-19	Bo	50	tract_extension	1.3524401784507232
chimp	L	MDLF	sub-19	Cheeta	20	dice_coeff	0.5519751921261966
chimp	L	MDLF	sub-19	Cheeta	30	dice_coeff	0.6418851036624349
chimp	L	MDLF	sub-19	Cheeta	40	dice_coeff	0.6837011227255129
chimp	L	MDLF	sub-19	Cheeta	50	dice_coeff	0.6891712869829744
chimp	L	MDLF	sub-19	Cheeta	20	tract_extension	1.8309721543722521
chimp	L	MDLF	sub-19	Cheeta	30	tract_extension	1.7111553784860558
chimp	L	MDLF	sub-19	Cheeta	40	tract_extension	1.5256700641751604
chimp	L	MDLF	sub-19	Cheeta	50	tract_extension	1.4244624804214723
chimp	L	MDLF	sub-19	Lulu	20	dice_coeff	0.643671917436176
chimp	L	MDLF	sub-19	Lulu	30	dice_coeff	0.6547639484978541
chimp	L	MDLF	sub-19	Lulu	40	dice_coeff	0.6872852233676976
chimp	L	MDLF	sub-19	Lulu	50	dice_coeff	0.6904490106544902
chimp	L	MDLF	sub-19	Lulu	20	tract_extension	1.581434599156118
chimp	L	MDLF	sub-19	Lulu	30	tract_extension	1.576560041950708
chimp	L	MDLF	sub-19	Lulu	40	tract_extension	1.4180701754385965
chimp	L	MDLF	sub-19	Lulu	50	tract_extension	1.3783411408101405
chimp	L	MDLF	sub-19	Wenka	20	dice_coeff	0.6600196947316593
chimp	L	MDLF	sub-19	Wenka	30	dice_coeff	0.7480287967089475
chimp	L	MDLF	sub-19	Wenka	40	dice_coeff	0.7868730650154799
chimp	L	MDLF	sub-19	Wenka	50	dice_coeff	0.7770639099560407
chimp	L	MDLF	sub-19	Wenka	20	tract_extension	1.3979858261842597
chimp	L	MDLF	sub-19	Wenka	30	tract_extension	1.3778643446379468
chimp	L	MDLF	sub-19	Wenka	40	tract_extension	1.2721120553981744
chimp	L	MDLF	sub-19	Wenka	50	tract_extension	1.2438144970782046
chimp	L	MDLF	sub-19	Foxy	20	dice_coeff	0.5578214059531349
chimp	L	MDLF	sub-19	Foxy	30	dice_coeff	0.6455738808481992
chimp	L	MDLF	sub-19	Foxy	40	dice_coeff	0.7056787591334444
chimp	L	MDLF	sub-19	Foxy	50	dice_coeff	0.720462624011884
chimp	L	MDLF	sub-19	Foxy	20	tract_extension	1.7020890099909174
chimp	L	MDLF	sub-19	Foxy	30	tract_extension	1.5675182481751824
chimp	L	MDLF	sub-19	Foxy	40	tract_extension	1.4683015440508629
chimp	L	MDLF	sub-19	Foxy	50	tract_extension	1.4733431516936673
chimp	L	MDLF	sub-20	Bo	20	dice_coeff	0.5950875128695396
chimp	L	MDLF	sub-20	Bo	30	dice_coeff	0.6643673988019604
chimp	L	MDLF	sub-20	Bo	40	dice_coeff	0.7001269035532995
chimp	L	MDLF	sub-20	Bo	50	dice_coeff	0.7461077844311377
chimp	L	MDLF	sub-20	Bo	20	tract_extension	1.9411764705882353
chimp	L	MDLF	sub-20	Bo	30	tract_extension	1.5986338797814208
chimp	L	MDLF	sub-20	Bo	40	tract_extension	1.4234185245604496
chimp	L	MDLF	sub-20	Bo	50	tract_extension	1.3247726056714821
chimp	L	MDLF	sub-20	Cheeta	20	dice_coeff	0.5558282208588957
chimp	L	MDLF	sub-20	Cheeta	30	dice_coeff	0.6591775739462022
chimp	L	MDLF	sub-20	Cheeta	40	dice_coeff	0.6935039809509637
chimp	L	MDLF	sub-20	Cheeta	50	dice_coeff	0.7195439198538772
chimp	L	MDLF	sub-20	Cheeta	20	tract_extension	2.1672185430463577
chimp	L	MDLF	sub-20	Cheeta	30	tract_extension	1.8295809881175735
chimp	L	MDLF	sub-20	Cheeta	40	tract_extension	1.6851931330472103
chimp	L	MDLF	sub-20	Cheeta	50	tract_extension	1.5236923076923077
chimp	L	MDLF	sub-20	Lulu	20	dice_coeff	0.577567140600316
chimp	L	MDLF	sub-20	Lulu	30	dice_coeff	0.686397855006703
chimp	L	MDLF	sub-20	Lulu	40	dice_coeff	0.7184681559594838
chimp	L	MDLF	sub-20	Lulu	50	dice_coeff	0.7351699387798184
chimp	L	MDLF	sub-20	Lulu	20	tract_extension	2.1482494529540483
chimp	L	MDLF	sub-20	Lulu	30	tract_extension	1.7581129807692308
chimp	L	MDLF	sub-20	Lulu	40	tract_extension	1.5166087292390884
chimp	L	MDLF	sub-20	Lulu	50	tract_extension	1.4219669777458723
chimp	L	MDLF	sub-20	Wenka	20	dice_coeff	0.6892316481005427
chimp	L	MDLF	sub-20	Wenka	30	dice_coeff	0.7799845738526803
chimp	L	MDLF	sub-20	Wenka	40	dice_coeff	0.7875409379137343
chimp	L	MDLF	sub-20	Wenka	50	dice_coeff	0.8186091749067921
chimp	L	MDLF	sub-20	Wenka	20	tract_extension	1.6274347285536677
chimp	L	MDLF	sub-20	Wenka	30	tract_extension	1.446477132262052
chimp	L	MDLF	sub-20	Wenka	40	tract_extension	1.3896655459210758
chimp	L	MDLF	sub-20	Wenka	50	tract_extension	1.3074587458745874
chimp	L	MDLF	sub-20	Foxy	20	dice_coeff	0.5954558866922396
chimp	L	MDLF	sub-20	Foxy	30	dice_coeff	0.6723263075722092
chimp	L	MDLF	sub-20	Foxy	40	dice_coeff	0.7321140774998247
chimp	L	MDLF	sub-20	Foxy	50	dice_coeff	0.7701772209052941
chimp	L	MDLF	sub-20	Foxy	20	tract_extension	1.945986124876115
chimp	L	MDLF	sub-20	Foxy	30	tract_extension	1.6984034833091437
chimp	L	MDLF	sub-20	Foxy	40	tract_extension	1.5032542113323124
chimp	L	MDLF	sub-20	Foxy	50	tract_extension	1.451560896966144
chimp	L	MDLF	sub-21	Bo	20	dice_coeff	0.5912634574928846
chimp	L	MDLF	sub-21	Bo	30	dice_coeff	0.6042615484710474
chimp	L	MDLF	sub-21	Bo	40	dice_coeff	0.6396796056685151
chimp	L	MDLF	sub-21	Bo	50	dice_coeff	0.703617558271886
chimp	L	MDLF	sub-21	Bo	20	tract_extension	1.6345751360401841
chimp	L	MDLF	sub-21	Bo	30	tract_extension	1.5924629878869447
chimp	L	MDLF	sub-21	Bo	40	tract_extension	1.5490271623964553
chimp	L	MDLF	sub-21	Bo	50	tract_extension	1.4166549444366296
chimp	L	MDLF	sub-21	Cheeta	20	dice_coeff	0.5662188099808062
chimp	L	MDLF	sub-21	Cheeta	30	dice_coeff	0.6209923664122138
chimp	L	MDLF	sub-21	Cheeta	40	dice_coeff	0.6487421610322208
chimp	L	MDLF	sub-21	Cheeta	50	dice_coeff	0.6745640013162224
chimp	L	MDLF	sub-21	Cheeta	20	tract_extension	1.8910411622276029
chimp	L	MDLF	sub-21	Cheeta	30	tract_extension	1.8180700676090964
chimp	L	MDLF	sub-21	Cheeta	40	tract_extension	1.786888888888889
chimp	L	MDLF	sub-21	Cheeta	50	tract_extension	1.637560975609756
chimp	L	MDLF	sub-21	Lulu	20	dice_coeff	0.6370412037688089
chimp	L	MDLF	sub-21	Lulu	30	dice_coeff	0.641405820977485
chimp	L	MDLF	sub-21	Lulu	40	dice_coeff	0.6964094319399785
chimp	L	MDLF	sub-21	Lulu	50	dice_coeff	0.7222600052314936
chimp	L	MDLF	sub-21	Lulu	20	tract_extension	1.7240618101545253
chimp	L	MDLF	sub-21	Lulu	30	tract_extension	1.6883561643835616
chimp	L	MDLF	sub-21	Lulu	40	tract_extension	1.5469411312043093
chimp	L	MDLF	sub-21	Lulu	50	tract_extension	1.4589308996088657
chimp	L	MDLF	sub-21	Wenka	20	dice_coeff	0.6856204195097296
chimp	L	MDLF	sub-21	Wenka	30	dice_coeff	0.7259671483708823
chimp	L	MDLF	sub-21	Wenka	40	dice_coeff	0.7563070679742983
chimp	L	MDLF	sub-21	Wenka	50	dice_coeff	0.7835493199100354
chimp	L	MDLF	sub-21	Wenka	20	tract_extension	1.4393660154810173
chimp	L	MDLF	sub-21	Wenka	30	tract_extension	1.4629080118694362
chimp	L	MDLF	sub-21	Wenka	40	tract_extension	1.4382042568413522
chimp	L	MDLF	sub-21	Wenka	50	tract_extension	1.376571897211591
chimp	L	MDLF	sub-21	Foxy	20	dice_coeff	0.5781270464963981
chimp	L	MDLF	sub-21	Foxy	30	dice_coeff	0.6247024596667549
chimp	L	MDLF	sub-21	Foxy	40	dice_coeff	0.7062683710438171
chimp	L	MDLF	sub-21	Foxy	50	dice_coeff	0.7557170813530892
chimp	L	MDLF	sub-21	Foxy	20	tract_extension	1.769370185772542
chimp	L	MDLF	sub-21	Foxy	30	tract_extension	1.6697713801862828
chimp	L	MDLF	sub-21	Foxy	40	tract_extension	1.556523422377081
chimp	L	MDLF	sub-21	Foxy	50	tract_extension	1.4902337969813555
chimp	L	VOF	sub-01	Bo	20	dice_coeff	0.7539917208752217
chimp	L	VOF	sub-01	Bo	30	dice_coeff	0.771417812088119
chimp	L	VOF	sub-01	Bo	40	dice_coeff	0.7291713451605659
chimp	L	VOF	sub-01	Bo	50	dice_coeff	0.7727183513248281
chimp	L	VOF	sub-01	Bo	20	tract_extension	1.567843137254902
chimp	L	VOF	sub-01	Bo	30	tract_extension	1.475225774957286
chimp	L	VOF	sub-01	Bo	40	tract_extension	1.2440714505697568
chimp	L	VOF	sub-01	Bo	50	tract_extension	1.1918973837947675
chimp	L	VOF	sub-01	Cheeta	20	dice_coeff	0.8030731904569349
chimp	L	VOF	sub-01	Cheeta	30	dice_coeff	0.8255678247598528
chimp	L	VOF	sub-01	Cheeta	40	dice_coeff	0.7468276594555313
chimp	L	VOF	sub-01	Cheeta	50	dice_coeff	0.7740252067743205
chimp	L	VOF	sub-01	Cheeta	20	tract_extension	1.3420610943269553
chimp	L	VOF	sub-01	Cheeta	30	tract_extension	1.3144845585036973
chimp	L	VOF	sub-01	Cheeta	40	tract_extension	1.2094311377245508
chimp	L	VOF	sub-01	Cheeta	50	tract_extension	1.1938684645719375
chimp	L	VOF	sub-01	Lulu	20	dice_coeff	0.8471037555697009
chimp	L	VOF	sub-01	Lulu	30	dice_coeff	0.8672072985301572
chimp	L	VOF	sub-01	Lulu	40	dice_coeff	0.7911956521739131
chimp	L	VOF	sub-01	Lulu	50	dice_coeff	0.7995194617972128
chimp	L	VOF	sub-01	Lulu	20	tract_extension	1.2016831980763452
chimp	L	VOF	sub-01	Lulu	30	tract_extension	1.1774790570816287
chimp	L	VOF	sub-01	Lulu	40	tract_extension	1.1099052067591701
chimp	L	VOF	sub-01	Lulu	50	tract_extension	1.1281404014905638
chimp	L	VOF	sub-01	Wenka	20	dice_coeff	0.7949562974638201
chimp	L	VOF	sub-01	Wenka	30	dice_coeff	0.8412420528886022
chimp	L	VOF	sub-01	Wenka	40	dice_coeff	0.808051341890315
chimp	L	VOF	sub-01	Wenka	50	dice_coeff	0.8109437751004016
chimp	L	VOF	sub-01	Wenka	20	tract_extension	1.441240086517664
chimp	L	VOF	sub-01	Wenka	30	tract_extension	1.323986856516977
chimp	L	VOF	sub-01	Wenka	40	tract_extension	1.1666425992779783
chimp	L	VOF	sub-01	Wenka	50	tract_extension	1.1619413148446205
chimp	L	VOF	sub-01	Foxy	20	dice_coeff	0.8442655935613682
chimp	L	VOF	sub-01	Foxy	30	dice_coeff	0.8702636633490484
chimp	L	VOF	sub-01	Foxy	40	dice_coeff	0.7997732426303854
chimp	L	VOF	sub-01	Foxy	50	dice_coeff	0.8031386571315059
chimp	L	VOF	sub-01	Foxy	20	tract_extension	1.2704162694629806
chimp	L	VOF	sub-01	Foxy	30	tract_extension	1.2126805778491172
chimp	L	VOF	sub-01	Foxy	40	tract_extension	1.1453076268783668
chimp	L	VOF	sub-01	Foxy	50	tract_extension	1.1606480336383873
chimp	L	VOF	sub-02	Bo	20	dice_coeff	0.7523809523809524
chimp	L	VOF	sub-02	Bo	30	dice_coeff	0.7368330316352039
chimp	L	VOF	sub-02	Bo	40	dice_coeff	0.7352992700729927
chimp	L	VOF	sub-02	Bo	50	dice_coeff	0.7914022920663026
chimp	L	VOF	sub-02	Bo	20	tract_extension	1.6004746835443038
chimp	L	VOF	sub-02	Bo	30	tract_extension	1.4106223678053347
chimp	L	VOF	sub-02	Bo	40	tract_extension	1.2468233799237611
chimp	L	VOF	sub-02	Bo	50	tract_extension	1.16047234307023
chimp	L	VOF	sub-02	Cheeta	20	dice_coeff	0.772888767422793
chimp	L	VOF	sub-02	Cheeta	30	dice_coeff	0.7716535433070866
chimp	L	VOF	sub-02	Cheeta	40	dice_coeff	0.7520540761027913
chimp	L	VOF	sub-02	Cheeta	50	dice_coeff	0.7888269259240982
chimp	L	VOF	sub-02	Cheeta	20	tract_extension	1.4306930693069306
chimp	L	VOF	sub-02	Cheeta	30	tract_extension	1.3089448545375597
chimp	L	VOF	sub-02	Cheeta	40	tract_extension	1.2164884549821788
chimp	L	VOF	sub-02	Cheeta	50	tract_extension	1.1681681681681682
chimp	L	VOF	sub-02	Lulu	20	dice_coeff	0.8102603763856664
chimp	L	VOF	sub-02	Lulu	30	dice_coeff	0.8328675237562885
chimp	L	VOF	sub-02	Lulu	40	dice_coeff	0.80222020842773
chimp	L	VOF	sub-02	Lulu	50	dice_coeff	0.8100765859062665
chimp	L	VOF	sub-02	Lulu	20	tract_extension	1.287305122494432
chimp	L	VOF	sub-02	Lulu	30	tract_extension	1.1560882070949186
chimp	L	VOF	sub-02	Lulu	40	tract_extension	1.1084439423891557
chimp	L	VOF	sub-02	Lulu	50	tract_extension	1.1102390296111309
chimp	L	VOF	sub-02	Wenka	20	dice_coeff	0.7691189299214888
chimp	L	VOF	sub-02	Wenka	30	dice_coeff	0.825765575501584
chimp	L	VOF	sub-02	Wenka	40	dice_coeff	0.8293405779204741
chimp	L	VOF	sub-02	Wenka	50	dice_coeff	0.8265311257611595
chimp	L	VOF	sub-02	Wenka	20	tract_extension	1.5296786389413988
chimp	L	VOF	sub-02	Wenka	30	tract_extension	1.2849531116794544
chimp	L	VOF	sub-02	Wenka	40	tract_extension	1.1688505062537224
chimp	L	VOF	sub-02	Wenka	50	tract_extension	1.1368728689722358
chimp	L	VOF	sub-02	Foxy	20	dice_coeff	0.8219624898070128
chimp	L	VOF	sub-02	Foxy	30	dice_coeff	0.8546579695601272
chimp	L	VOF	sub-02	Foxy	40	dice_coeff	0.8273192806954865
chimp	L	VOF	sub-02	Foxy	50	dice_coeff	0.821128092796336
chimp	L	VOF	sub-02	Foxy	20	tract_extension	1.337962962962963
chimp	L	VOF	sub-02	Foxy	30	tract_extension	1.1798434442270058
chimp	L	VOF	sub-02	Foxy	40	tract_extension	1.1299841658269756
chimp	L	VOF	sub-02	Foxy	50	tract_extension	1.132048017460895
chimp	L	VOF	sub-03	Bo	20	dice_coeff	0.7949718248807975
chimp	L	VOF	sub-03	Bo	30	dice_coeff	0.7323631762100601
chimp	L	VOF	sub-03	Bo	40	dice_coeff	0.758070944599442
chimp	L	VOF	sub-03	Bo	50	dice_coeff	0.8120647327020392
chimp	L	VOF	sub-03	Bo	20	tract_extension	1.450745183569611
chimp	L	VOF	sub-03	Bo	30	tract_extension	1.3075593952483802
chimp	L	VOF	sub-03	Bo	40	tract_extension	1.1762054979720595
chimp	L	VOF	sub-03	Bo	50	tract_extension	1.1061204343534057
chimp	L	VOF	sub-03	Cheeta	20	dice_coeff	0.7786379740191577
chimp	L	VOF	sub-03	Cheeta	30	dice_coeff	0.7607952780366574
chimp	L	VOF	sub-03	Cheeta	40	dice_coeff	0.764172335600907
chimp	L	VOF	sub-03	Cheeta	50	dice_coeff	0.806797043889196
chimp	L	VOF	sub-03	Cheeta	20	tract_extension	1.3451297607010448
chimp	L	VOF	sub-03	Cheeta	30	tract_extension	1.236014699877501
chimp	L	VOF	sub-03	Cheeta	40	tract_extension	1.1617210682492582
chimp	L	VOF	sub-03	Cheeta	50	tract_extension	1.117148554336989
chimp	L	VOF	sub-03	Lulu	20	dice_coeff	0.8285325751019903
chimp	L	VOF	sub-03	Lulu	30	dice_coeff	0.8188800238610097
chimp	L	VOF	sub-03	Lulu	40	dice_coeff	0.8067875048206711
chimp	L	VOF	sub-03	Lulu	50	dice_coeff	0.8277012114375398
chimp	L	VOF	sub-03	Lulu	20	tract_extension	1.1909877648463145
chimp	L	VOF	sub-03	Lulu	30	tract_extension	1.1025314150427974
chimp	L	VOF	sub-03	Lulu	40	tract_extension	1.0693799508331057
chimp	L	VOF	sub-03	Lulu	50	tract_extension	1.0623370466935294
chimp	L	VOF	sub-03	Wenka	20	dice_coeff	0.8162464985994399
chimp	L	VOF	sub-03	Wenka	30	dice_coeff	0.8261795543905636
chimp	L	VOF	sub-03	Wenka	40	dice_coeff	0.827778106684033
chimp	L	VOF	sub-03	Wenka	50	dice_coeff	0.8446587004461767
chimp	L	VOF	sub-03	Wenka	20	tract_extension	1.3695950583390528
chimp	L	VOF	sub-03	Wenka	30	tract_extension	1.2004759071980964
chimp	L	VOF	sub-03	Wenka	40	tract_extension	1.1200114432842225
chimp	L	VOF	sub-03	Wenka	50	tract_extension	1.0885245901639344
chimp	L	VOF	sub-03	Foxy	20	dice_coeff	0.8427656515488172
chimp	L	VOF	sub-03	Foxy	30	dice_coeff	0.8344155844155844
chimp	L	VOF	sub-03	Foxy	40	dice_coeff	0.824104421827382
chimp	L	VOF	sub-03	Foxy	50	dice_coeff	0.8399695663200609
chimp	L	VOF	sub-03	Foxy	20	tract_extension	1.2379032258064515
chimp	L	VOF	sub-03	Foxy	30	tract_extension	1.121734296831573
chimp	L	VOF	sub-03	Foxy	40	tract_extension	1.0926597823053308
chimp	L	VOF	sub-03	Foxy	50	tract_extension	1.0826086956521739
chimp	L	VOF	sub-04	Bo	20	dice_coeff	0.7463789535914868
chimp	L	VOF	sub-04	Bo	30	dice_coeff	0.7625103677080454
chimp	L	VOF	sub-04	Bo	40	dice_coeff	0.7346792497909449
chimp	L	VOF	sub-04	Bo	50	dice_coeff	0.8062223929325908
chimp	L	VOF	sub-04	Bo	20	tract_extension	1.6023762376237625
chimp	L	VOF	sub-04	Bo	30	tract_extension	1.4597534445250182
chimp	L	VOF	sub-04	Bo	40	tract_extension	1.2886178861788617
chimp	L	VOF	sub-04	Bo	50	tract_extension	1.1711529299666508
chimp	L	VOF	sub-04	Cheeta	20	dice_coeff	0.7915089237425635
chimp	L	VOF	sub-04	Cheeta	30	dice_coeff	0.8162071105594467
chimp	L	VOF	sub-04	Cheeta	40	dice_coeff	0.7705240565194061
chimp	L	VOF	sub-04	Cheeta	50	dice_coeff	0.8080924855491329
chimp	L	VOF	sub-04	Cheeta	20	tract_extension	1.3823026990092244
chimp	L	VOF	sub-04	Cheeta	30	tract_extension	1.3119704540517054
chimp	L	VOF	sub-04	Cheeta	40	tract_extension	1.2264004952027237
chimp	L	VOF	sub-04	Cheeta	50	tract_extension	1.172269909394373
chimp	L	VOF	sub-04	Lulu	20	dice_coeff	0.8307378095481235
chimp	L	VOF	sub-04	Lulu	30	dice_coeff	0.8676948728636933
chimp	L	VOF	sub-04	Lulu	40	dice_coeff	0.8224440060345828
chimp	L	VOF	sub-04	Lulu	50	dice_coeff	0.8294289208768463
chimp	L	VOF	sub-04	Lulu	20	tract_extension	1.2433927473878303
chimp	L	VOF	sub-04	Lulu	30	tract_extension	1.1604534973097618
chimp	L	VOF	sub-04	Lulu	40	tract_extension	1.1182446733455622
chimp	L	VOF	sub-04	Lulu	50	tract_extension	1.115358439201452
chimp	L	VOF	sub-04	Wenka	20	dice_coeff	0.7830093592512599
chimp	L	VOF	sub-04	Wenka	30	dice_coeff	0.8452119883040936
chimp	L	VOF	sub-04	Wenka	40	dice_coeff	0.8469316375198728
chimp	L	VOF	sub-04	Wenka	50	dice_coeff	0.8390612725844463
chimp	L	VOF	sub-04	Wenka	20	tract_extension	1.4880470761309306
chimp	L	VOF	sub-04	Wenka	30	tract_extension	1.3057297297297297
chimp	L	VOF	sub-04	Wenka	40	tract_extension	1.1901186364318967
chimp	L	VOF	sub-04	Wenka	50	tract_extension	1.1507314218841427
chimp	L	VOF	sub-04	Foxy	20	dice_coeff	0.8144857296715132
chimp	L	VOF	sub-04	Foxy	30	dice_coeff	0.8704537582265328
chimp	L	VOF	sub-04	Foxy	40	dice_coeff	0.8485889570552148
chimp	L	VOF	sub-04	Foxy	50	dice_coeff	0.8330742324135251
chimp	L	VOF	sub-04	Foxy	20	tract_extension	1.3375206611570247
chimp	L	VOF	sub-04	Foxy	30	tract_extension	1.2015519299641861
chimp	L	VOF	sub-04	Foxy	40	tract_extension	1.1458935801041064
chimp	L	VOF	sub-04	Foxy	50	tract_extension	1.1468392815488686
chimp	L	VOF	sub-05	Bo	20	dice_coeff	0.6990630458948706
chimp	L	VOF	sub-05	Bo	30	dice_coeff	0.7665944826287543
chimp	L	VOF	sub-05	Bo	40	dice_coeff	0.7345850855890541
chimp	L	VOF	sub-05	Bo	50	dice_coeff	0.7994293865905848
chimp	L	VOF	sub-05	Bo	20	tract_extension	1.8155383916401635
chimp	L	VOF	sub-05	Bo	30	tract_extension	1.4844018668631787
chimp	L	VOF	sub-05	Bo	40	tract_extension	1.3007579422673763
chimp	L	VOF	sub-05	Bo	50	tract_extension	1.1937901498929335
chimp	L	VOF	sub-05	Cheeta	20	dice_coeff	0.6886535552193647
chimp	L	VOF	sub-05	Cheeta	30	dice_coeff	0.8215119411025319
chimp	L	VOF	sub-05	Cheeta	40	dice_coeff	0.7625635568168381
chimp	L	VOF	sub-05	Cheeta	50	dice_coeff	0.8006869573513978
chimp	L	VOF	sub-05	Cheeta	20	tract_extension	1.7557117750439368
chimp	L	VOF	sub-05	Cheeta	30	tract_extension	1.3208743169398907
chimp	L	VOF	sub-05	Cheeta	40	tract_extension	1.2507365483020623
chimp	L	VOF	sub-05	Cheeta	50	tract_extension	1.1957816968541468
chimp	L	VOF	sub-05	Lulu	20	dice_coeff	0.7886391837860196
chimp	L	VOF	sub-05	Lulu	30	dice_coeff	0.8664357523021035
chimp	L	VOF	sub-05	Lulu	40	dice_coeff	0.8200287769784173
chimp	L	VOF	sub-05	Lulu	50	dice_coeff	0.8233923578751164
chimp	L	VOF	sub-05	Lulu	20	tract_extension	1.3972027972027972
chimp	L	VOF	sub-05	Lulu	30	tract_extension	1.1784321372854913
chimp	L	VOF	sub-05	Lulu	40	tract_extension	1.1322290847838292
chimp	L	VOF	sub-05	Lulu	50	tract_extension	1.1358234295415959
chimp	L	VOF	sub-05	Wenka	20	dice_coeff	0.6967379428749805
chimp	L	VOF	sub-05	Wenka	30	dice_coeff	0.8376336159233322
chimp	L	VOF	sub-05	Wenka	40	dice_coeff	0.839783184167402
chimp	L	VOF	sub-05	Wenka	50	dice_coeff	0.8304326689353427
chimp	L	VOF	sub-05	Wenka	20	tract_extension	1.7903225806451613
chimp	L	VOF	sub-05	Wenka	30	tract_extension	1.3295929592959297
chimp	L	VOF	sub-05	Wenka	40	tract_extension	1.2107475232662863
chimp	L	VOF	sub-05	Wenka	50	tract_extension	1.1749209694415175
chimp	L	VOF	sub-05	Foxy	20	dice_coeff	0.7635410599883518
chimp	L	VOF	sub-05	Foxy	30	dice_coeff	0.8671963677639046
chimp	L	VOF	sub-05	Foxy	40	dice_coeff	0.8438659448938629
chimp	L	VOF	sub-05	Foxy	50	dice_coeff	0.8266140671605888
chimp	L	VOF	sub-05	Foxy	20	tract_extension	1.5240274599542334
chimp	L	VOF	sub-05	Foxy	30	tract_extension	1.2168747482883608
chimp	L	VOF	sub-05	Foxy	40	tract_extension	1.1627504685022343
chimp	L	VOF	sub-05	Foxy	50	tract_extension	1.1680828774298684
chimp	L	VOF	sub-06	Bo	20	dice_coeff	0.6872030651340997
chimp	L	VOF	sub-06	Bo	30	dice_coeff	0.7455379908210098
chimp	L	VOF	sub-06	Bo	40	dice_coeff	0.7237464522232735
chimp	L	VOF	sub-06	Bo	50	dice_coeff	0.7958251166370064
chimp	L	VOF	sub-06	Bo	20	tract_extension	1.795272078501338
chimp	L	VOF	sub-06	Bo	30	tract_extension	1.6517099863201095
chimp	L	VOF	sub-06	Bo	40	tract_extension	1.3227124183006536
chimp	L	VOF	sub-06	Bo	50	tract_extension	1.1840928321044362
chimp	L	VOF	sub-06	Cheeta	20	dice_coeff	0.7257347670250897
chimp	L	VOF	sub-06	Cheeta	30	dice_coeff	0.7878845786355819
chimp	L	VOF	sub-06	Cheeta	40	dice_coeff	0.7584253083869443
chimp	L	VOF	sub-06	Cheeta	50	dice_coeff	0.7977609419485595
chimp	L	VOF	sub-06	Cheeta	20	tract_extension	1.590280521532991
chimp	L	VOF	sub-06	Cheeta	30	tract_extension	1.4642250788260975
chimp	L	VOF	sub-06	Cheeta	40	tract_extension	1.2599221789883268
chimp	L	VOF	sub-06	Cheeta	50	tract_extension	1.1850955722235663
chimp	L	VOF	sub-06	Lulu	20	dice_coeff	0.7468658308882369
chimp	L	VOF	sub-06	Lulu	30	dice_coeff	0.8479699517081023
chimp	L	VOF	sub-06	Lulu	40	dice_coeff	0.8144104803493449
chimp	L	VOF	sub-06	Lulu	50	dice_coeff	0.8219216813533763
chimp	L	VOF	sub-06	Lulu	20	tract_extension	1.4375
chimp	L	VOF	sub-06	Lulu	30	tract_extension	1.2733600506222316
chimp	L	VOF	sub-06	Lulu	40	tract_extension	1.1422322562438267
chimp	L	VOF	sub-06	Lulu	50	tract_extension	1.1232656805412224
chimp	L	VOF	sub-06	Wenka	20	dice_coeff	0.7011615628299894
chimp	L	VOF	sub-06	Wenka	30	dice_coeff	0.7871031746031745
chimp	L	VOF	sub-06	Wenka	40	dice_coeff	0.8348537275872915
chimp	L	VOF	sub-06	Wenka	50	dice_coeff	0.8302592100732872
chimp	L	VOF	sub-06	Wenka	20	tract_extension	1.7319277108433735
chimp	L	VOF	sub-06	Wenka	30	tract_extension	1.5218048903453492
chimp	L	VOF	sub-06	Wenka	40	tract_extension	1.2200452147701581
chimp	L	VOF	sub-06	Wenka	50	tract_extension	1.1606635071090048
chimp	L	VOF	sub-06	Foxy	20	dice_coeff	0.7555867884750528
chimp	L	VOF	sub-06	Foxy	30	dice_coeff	0.8243568387932629
chimp	L	VOF	sub-06	Foxy	40	dice_coeff	0.8364298724954463
chimp	L	VOF	sub-06	Foxy	50	dice_coeff	0.8234778799824792
chimp	L	VOF	sub-06	Foxy	20	tract_extension	1.4973958333333333
chimp	L	VOF	sub-06	Foxy	30	tract_extension	1.355410866636731
chimp	L	VOF	sub-06	Foxy	40	tract_extension	1.1752322880371662
chimp	L	VOF	sub-06	Foxy	50	tract_extension	1.157919621749409
chimp	L	VOF	sub-07	Bo	20	dice_coeff	0.748541423570595
chimp	L	VOF	sub-07	Bo	30	dice_coeff	0.738860103626943
chimp	L	VOF	sub-07	Bo	40	dice_coeff	0.7378211835833042
chimp	L	VOF	sub-07	Bo	50	dice_coeff	0.806639085894405
chimp	L	VOF	sub-07	Bo	20	tract_extension	1.573265783320343
chimp	L	VOF	sub-07	Bo	30	tract_extension	1.4043945769050958
chimp	L	VOF	sub-07	Bo	40	tract_extension	1.249133312322723
chimp	L	VOF	sub-07	Bo	50	tract_extension	1.1367688362437416
chimp	L	VOF	sub-07	Cheeta	20	dice_coeff	0.7955390334572491
chimp	L	VOF	sub-07	Cheeta	30	dice_coeff	0.795502223714022
chimp	L	VOF	sub-07	Cheeta	40	dice_coeff	0.7635456549483699
chimp	L	VOF	sub-07	Cheeta	50	dice_coeff	0.8086578375172959
chimp	L	VOF	sub-07	Cheeta	20	tract_extension	1.3474632843791723
chimp	L	VOF	sub-07	Cheeta	30	tract_extension	1.2675105485232068
chimp	L	VOF	sub-07	Cheeta	40	tract_extension	1.204528187205592
chimp	L	VOF	sub-07	Cheeta	50	tract_extension	1.1377413835248105
chimp	L	VOF	sub-07	Lulu	20	dice_coeff	0.8586847389558232
chimp	L	VOF	sub-07	Lulu	30	dice_coeff	0.8483442649176132
chimp	L	VOF	sub-07	Lulu	40	dice_coeff	0.8121581232729939
chimp	L	VOF	sub-07	Lulu	50	dice_coeff	0.8287836403974149
chimp	L	VOF	sub-07	Lulu	20	tract_extension	1.180064308681672
chimp	L	VOF	sub-07	Lulu	30	tract_extension	1.1329436168206675
chimp	L	VOF	sub-07	Lulu	40	tract_extension	1.100819330648521
chimp	L	VOF	sub-07	Lulu	50	tract_extension	1.083449720670391
chimp	L	VOF	sub-07	Wenka	20	dice_coeff	0.7930547713156408
chimp	L	VOF	sub-07	Wenka	30	dice_coeff	0.8429868641452878
chimp	L	VOF	sub-07	Wenka	40	dice_coeff	0.8358630860935291
chimp	L	VOF	sub-07	Wenka	50	dice_coeff	0.8410602701068334
chimp	L	VOF	sub-07	Wenka	20	tract_extension	1.4371662513349948
chimp	L	VOF	sub-07	Wenka	30	tract_extension	1.2566408701108556
chimp	L	VOF	sub-07	Wenka	40	tract_extension	1.165563887663579
chimp	L	VOF	sub-07	Wenka	50	tract_extension	1.1155182744158179
chimp	L	VOF	sub-07	Foxy	20	dice_coeff	0.8334435771927503
chimp	L	VOF	sub-07	Foxy	30	dice_coeff	0.8583396163190081
chimp	L	VOF	sub-07	Foxy	40	dice_coeff	0.8332641811392331
chimp	L	VOF	sub-07	Foxy	50	dice_coeff	0.8363908275174476
chimp	L	VOF	sub-07	Foxy	20	tract_extension	1.2815873015873016
chimp	L	VOF	sub-07	Foxy	30	tract_extension	1.1727503415967206
chimp	L	VOF	sub-07	Foxy	40	tract_extension	1.1277564376155926
chimp	L	VOF	sub-07	Foxy	50	tract_extension	1.1096674216235547
chimp	L	VOF	sub-08	Bo	20	dice_coeff	0.7271329746348961
chimp	L	VOF	sub-08	Bo	30	dice_coeff	0.7655346820809248
chimp	L	VOF	sub-08	Bo	40	dice_coeff	0.7461802126299889
chimp	L	VOF	sub-08	Bo	50	dice_coeff	0.7935446350683337
chimp	L	VOF	sub-08	Bo	20	tract_extension	1.6790697674418604
chimp	L	VOF	sub-08	Bo	30	tract_extension	1.4263803680981595
chimp	L	VOF	sub-08	Bo	40	tract_extension	1.2360635316100903
chimp	L	VOF	sub-08	Bo	50	tract_extension	1.1773543422499084
chimp	L	VOF	sub-08	Cheeta	20	dice_coeff	0.779777206512425
chimp	L	VOF	sub-08	Cheeta	30	dice_coeff	0.8073970690858339
chimp	L	VOF	sub-08	Cheeta	40	dice_coeff	0.7618992405356831
chimp	L	VOF	sub-08	Cheeta	50	dice_coeff	0.7938344840999708
chimp	L	VOF	sub-08	Cheeta	20	tract_extension	1.4545787545787545
chimp	L	VOF	sub-08	Cheeta	30	tract_extension	1.3061797752808988
chimp	L	VOF	sub-08	Cheeta	40	tract_extension	1.2080353066504337
chimp	L	VOF	sub-08	Cheeta	50	tract_extension	1.1808158765159869
chimp	L	VOF	sub-08	Lulu	20	dice_coeff	0.8238590872698158
chimp	L	VOF	sub-08	Lulu	30	dice_coeff	0.8621142481943532
chimp	L	VOF	sub-08	Lulu	40	dice_coeff	0.8143597835888188
chimp	L	VOF	sub-08	Lulu	50	dice_coeff	0.8174135966578047
chimp	L	VOF	sub-08	Lulu	20	tract_extension	1.2863621639131844
chimp	L	VOF	sub-08	Lulu	30	tract_extension	1.150990099009901
chimp	L	VOF	sub-08	Lulu	40	tract_extension	1.0986851211072663
chimp	L	VOF	sub-08	Lulu	50	tract_extension	1.1196422348704844
chimp	L	VOF	sub-08	Wenka	20	dice_coeff	0.7475874547647767
chimp	L	VOF	sub-08	Wenka	30	dice_coeff	0.8394213381555153
chimp	L	VOF	sub-08	Wenka	40	dice_coeff	0.8380004912797837
chimp	L	VOF	sub-08	Wenka	50	dice_coeff	0.8282938435610192
chimp	L	VOF	sub-08	Wenka	20	tract_extension	1.6018555869302138
chimp	L	VOF	sub-08	Wenka	30	tract_extension	1.3022404136148211
chimp	L	VOF	sub-08	Wenka	40	tract_extension	1.1634178513850213
chimp	L	VOF	sub-08	Wenka	50	tract_extension	1.1536804308797128
chimp	L	VOF	sub-08	Foxy	20	dice_coeff	0.821563947774814
chimp	L	VOF	sub-08	Foxy	30	dice_coeff	0.8713175646827769
chimp	L	VOF	sub-08	Foxy	40	dice_coeff	0.8359199147020495
chimp	L	VOF	sub-08	Foxy	50	dice_coeff	0.822658165767533
chimp	L	VOF	sub-08	Foxy	20	tract_extension	1.3571428571428572
chimp	L	VOF	sub-08	Foxy	30	tract_extension	1.184829478635829
chimp	L	VOF	sub-08	Foxy	40	tract_extension	1.125
chimp	L	VOF	sub-08	Foxy	50	tract_extension	1.149278645522833
chimp	L	VOF	sub-09	Bo	20	dice_coeff	0.6793916821849783
chimp	L	VOF	sub-09	Bo	30	dice_coeff	0.7718715393133998
chimp	L	VOF	sub-09	Bo	40	dice_coeff	0.7414062952872298
chimp	L	VOF	sub-09	Bo	50	dice_coeff	0.8045207605743112
chimp	L	VOF	sub-09	Bo	20	tract_extension	1.8451347647327547
chimp	L	VOF	sub-09	Bo	30	tract_extension	1.4404591104734576
chimp	L	VOF	sub-09	Bo	40	tract_extension	1.2472243940578578
chimp	L	VOF	sub-09	Bo	50	tract_extension	1.160135053659713
chimp	L	VOF	sub-09	Cheeta	20	dice_coeff	0.7438040768441121
chimp	L	VOF	sub-09	Cheeta	30	dice_coeff	0.822265625
chimp	L	VOF	sub-09	Cheeta	40	dice_coeff	0.7634638745878406
chimp	L	VOF	sub-09	Cheeta	50	dice_coeff	0.8061125170332879
chimp	L	VOF	sub-09	Cheeta	20	tract_extension	1.5926656151419558
chimp	L	VOF	sub-09	Cheeta	30	tract_extension	1.300798963506802
chimp	L	VOF	sub-09	Cheeta	40	tract_extension	1.2086679799969693
chimp	L	VOF	sub-09	Cheeta	50	tract_extension	1.16167592368993
chimp	L	VOF	sub-09	Lulu	20	dice_coeff	0.7852512155591571
chimp	L	VOF	sub-09	Lulu	30	dice_coeff	0.8744574290484141
chimp	L	VOF	sub-09	Lulu	40	dice_coeff	0.8145315487571703
chimp	L	VOF	sub-09	Lulu	50	dice_coeff	0.8264753397320155
chimp	L	VOF	sub-09	Lulu	20	tract_extension	1.389404884760922
chimp	L	VOF	sub-09	Lulu	30	tract_extension	1.1500572737686139
chimp	L	VOF	sub-09	Lulu	40	tract_extension	1.1013532173432754
chimp	L	VOF	sub-09	Lulu	50	tract_extension	1.1062435322525008
chimp	L	VOF	sub-09	Wenka	20	dice_coeff	0.7253015727591999
chimp	L	VOF	sub-09	Wenka	30	dice_coeff	0.8447250434623479
chimp	L	VOF	sub-09	Wenka	40	dice_coeff	0.838255115794633
chimp	L	VOF	sub-09	Wenka	50	dice_coeff	0.8377654296487399
chimp	L	VOF	sub-09	Wenka	20	tract_extension	1.7006315789473685
chimp	L	VOF	sub-09	Wenka	30	tract_extension	1.3050259965337956
chimp	L	VOF	sub-09	Wenka	40	tract_extension	1.1659114164595819
chimp	L	VOF	sub-09	Wenka	50	tract_extension	1.1395238659244344
chimp	L	VOF	sub-09	Foxy	20	dice_coeff	0.773936548584436
chimp	L	VOF	sub-09	Foxy	30	dice_coeff	0.876961761900633
chimp	L	VOF	sub-09	Foxy	40	dice_coeff	0.8359338061465721
chimp	L	VOF	sub-09	Foxy	50	dice_coeff	0.832220695071667
chimp	L	VOF	sub-09	Foxy	20	tract_extension	1.4849264705882352
chimp	L	VOF	sub-09	Foxy	30	tract_extension	1.1912200909630215
chimp	L	VOF	sub-09	Foxy	40	tract_extension	1.1278280542986425
chimp	L	VOF	sub-09	Foxy	50	tract_extension	1.1349534033266486
chimp	L	VOF	sub-11	Bo	20	dice_coeff	0.6931297709923664
chimp	L	VOF	sub-11	Bo	30	dice_coeff	0.7715588320884663
chimp	L	VOF	sub-11	Bo	40	dice_coeff	0.7203301174009068
chimp	L	VOF	sub-11	Bo	50	dice_coeff	0.753652344685539
chimp	L	VOF	sub-11	Bo	20	tract_extension	1.7841409691629957
chimp	L	VOF	sub-11	Bo	30	tract_extension	1.5230072919285893
chimp	L	VOF	sub-11	Bo	40	tract_extension	1.2798128126512829
chimp	L	VOF	sub-11	Bo	50	tract_extension	1.2561332146942925
chimp	L	VOF	sub-11	Cheeta	20	dice_coeff	0.7285714285714285
chimp	L	VOF	sub-11	Cheeta	30	dice_coeff	0.806933431679882
chimp	L	VOF	sub-11	Cheeta	40	dice_coeff	0.744229207748521
chimp	L	VOF	sub-11	Cheeta	50	dice_coeff	0.7540006727858138
chimp	L	VOF	sub-11	Cheeta	20	tract_extension	1.588235294117647
chimp	L	VOF	sub-11	Cheeta	30	tract_extension	1.3841407678244972
chimp	L	VOF	sub-11	Cheeta	40	tract_extension	1.2361284289276808
chimp	L	VOF	sub-11	Cheeta	50	tract_extension	1.2596558317399618
chimp	L	VOF	sub-11	Lulu	20	dice_coeff	0.7776153130400106
chimp	L	VOF	sub-11	Lulu	30	dice_coeff	0.8649578530879064
chimp	L	VOF	sub-11	Lulu	40	dice_coeff	0.7948356542820094
chimp	L	VOF	sub-11	Lulu	50	dice_coeff	0.7786173557985638
chimp	L	VOF	sub-11	Lulu	20	tract_extension	1.3846153846153846
chimp	L	VOF	sub-11	Lulu	30	tract_extension	1.204653937947494
chimp	L	VOF	sub-11	Lulu	40	tract_extension	1.125124131082423
chimp	L	VOF	sub-11	Lulu	50	tract_extension	1.1913200723327306
chimp	L	VOF	sub-11	Wenka	20	dice_coeff	0.7195671776375113
chimp	L	VOF	sub-11	Wenka	30	dice_coeff	0.821776611694153
chimp	L	VOF	sub-11	Wenka	40	dice_coeff	0.8194384714628002
chimp	L	VOF	sub-11	Wenka	50	dice_coeff	0.790713621002106
chimp	L	VOF	sub-11	Wenka	20	tract_extension	1.6917293233082706
chimp	L	VOF	sub-11	Wenka	30	tract_extension	1.3812998859749144
chimp	L	VOF	sub-11	Wenka	40	tract_extension	1.1892337681811367
chimp	L	VOF	sub-11	Wenka	50	tract_extension	1.2242319127849355
chimp	L	VOF	sub-11	Foxy	20	dice_coeff	0.7703081232492998
chimp	L	VOF	sub-11	Foxy	30	dice_coeff	0.8571680790960452
chimp	L	VOF	sub-11	Foxy	40	dice_coeff	0.8130370370370371
chimp	L	VOF	sub-11	Foxy	50	dice_coeff	0.7822420394513643
chimp	L	VOF	sub-11	Foxy	20	tract_extension	1.4727272727272727
chimp	L	VOF	sub-11	Foxy	30	tract_extension	1.2475798146240988
chimp	L	VOF	sub-11	Foxy	40	tract_extension	1.1561224489795918
[truncated: 20,401 more rows]
